1 **Myogenetic oligodeoxynucleotide (myoDN) recovers the differentiation of**  
2 **skeletal muscle myoblasts deteriorated by diabetes mellitus**

3

4 Shunichi Nakamura<sup>1</sup>, Shinichi Yonekura<sup>2,3</sup>, Takeshi Shimosato<sup>1,2,3</sup>,  
5 Tomohide Takaya<sup>1,2,3\*</sup>

6

7 <sup>1</sup>Department of Agriculture, Graduate School of Science and Technology,  
8 Shinshu University, Nagano, Japan;

9 <sup>2</sup>Department of Agricultural and Life Sciences, Faculty of Agriculture,  
10 Shinshu University, Nagano, Japan;

11 <sup>3</sup>Department of Biomolecular Innovation, Institute for Biomedical Sciences,  
12 Shinshu University, Nagano, Japan

13

14 \*For correspondence:

15 Tomohide Takaya

16 ttakaya@shinshu-u.ac.jp.

17

18 **Running title:** myoDN recovers diabetic myoblast differentiation

19

20 **Abstract**

21 Sarcopenic obesity is a complication of decreased muscle mass and strength  
22 associated with obesity, and sarcopenia associated with diabetes mellitus  
23 (DM) is a serious risk factor that may result in mortality. Deteriorated  
24 differentiation of muscle precursor cells, called myoblasts, in DM patients is  
25 considered to be one of the causes of muscle atrophy. We recently developed  
26 myogenetic oligodeoxynucleotides (myoDNs), which are 18-base  
27 single-strand DNAs that promote myoblast differentiation by targeting  
28 nucleolin. Herein, we report the applicability of a myoDN, iSN04, to  
29 myoblasts isolated from patients with type 1 and type 2 DM. Myogenesis of  
30 DM myoblasts was exacerbated concordantly with a delayed shift of  
31 myogenic transcription and induction of interleukins. Analogous phenotypes  
32 were reproduced in healthy myoblasts cultured with excessive glucose or  
33 palmitic acid, mimicking hyperglycemia or hyperlipidemia. iSN04 treatment  
34 recovered the deteriorated differentiation of plural DM myoblasts by  
35 downregulating myostatin and interleukin-8. iSN04 also ameliorated the  
36 impaired myogenic differentiation induced by glucose or palmitic acid. These  
37 results demonstrate that myoDNs can directly facilitate myoblast  
38 differentiation in DM patients, making them novel candidates for nucleic  
39 acid drugs to treat sarcopenic obesity.

40

41 **Keywords**

42 myogenetic oligodeoxynucleotide (myoDN), skeletal muscle myoblasts,  
43 myogenic differentiation, diabetes mellitus, sarcopenic obesity

44

## 45 Introduction

46

47 The skeletal muscle is the largest organ associated with metabolism,  
48 glucose uptake, thermogenesis, and energy storage. A decrease in muscle  
49 mass affects motility, as well as the risk associated with mortality due to  
50 chronic diseases such as heart failure ([Anker et al., 1997](#)) and cancer  
51 ([Blauwhoff-Buskermolen et al., 2016](#)). Sarcopenia has been defined as an  
52 age-related loss of muscle mass and strength; however, sarcopenia has  
53 recently been recognized to arise with obesity, called sarcopenic obesity.  
54 Aging and obesity are major risk factors in diabetes mellitus (DM), and the  
55 number of patients with DM is increasing worldwide. Muscle wasting is  
56 associated with the risk of mortality in patients with DM ([Miyake et al.,](#)  
57 [2019](#)). Therefore, the prevention and treatment of DM-associated sarcopenic  
58 obesity is important for public health ([Wang et al., 2020](#)). The skeletal  
59 muscle is composed of a large number of myofibers, which are multinuclear  
60 fused myocytes. Each myofiber has dozens of stem cells, termed satellite cells,  
61 between the basal lamina and plasma membrane of the fibers. During  
62 myogenesis, satellite cells are activated to myogenic precursor cells, called  
63 myoblasts. Following this, myoblasts differentiate into mononuclear  
64 myocytes expressing myosin heavy chain (MHC), and mutually fused to form  
65 multinuclear myotubes ([Dumont et al., 2015](#)). However, the myogenic ability  
66 of myoblasts declines with aging or chronic diseases ([Fukada, 2018;](#)  
67 [McCormick and Vasilaki, 2018](#)), which is considered a predisposing factor for  
68 amyotrophic disorders.

69 Both type 1 DM (T1DM) and type 2 DM (T2DM) deteriorate the  
70 functions of satellite cells and myoblasts owing to oxidative stress, chronic  
71 inflammation, extracellular matrix defects, and transcriptional disorders  
72 (D'Souza et al., 2013; Teng and Huang, 2019). In patients with T1DM, the  
73 number of satellite cells decreases with the upregulation of the Notch ligand  
74 DLL1 (D'Souza et al., 2016). Myoblasts isolated from patients with T2DM  
75 show impaired myogenic differentiation with lower miR-23b/27b levels  
76 (Henriksen et al., 2017) and autophagy dysregulation (Henriksen et al.,  
77 2019). Even after differentiation, myotubes derived from T2DM-patient  
78 myoblasts retain an altered myokine secretion distinct from that of  
79 non-diabetic myotubes (Ciaraldi et al., 2016). Although the mechanisms  
80 underlying the deteriorated function of myoblasts in DM have not been fully  
81 elucidated, several factors have been reported to inhibit myogenic  
82 differentiation. Co-culture with adipocytes increases interleukin (IL)-6  
83 expression in myoblasts and attenuates their differentiation into myotubes  
84 (Seo et al., 2019). High ambient glucose suppresses the myogenesis of  
85 myoblasts by increasing the repressive myokine, myostatin, and decreasing  
86 myogenic transcription factors, MyoD and myogenin  
87 (Grzelkowska-Kowalczyk et al., 2013). Palmitic acid, a saturated fatty acid,  
88 blocks myotube formation by downregulating MyoD and myogenin (Saini et  
89 al., 2017). These findings demonstrate that diabetic factors including  
90 adipokines, glucose, and fatty acids are inhibitory factors for myoblast  
91 differentiation.

92           We recently identified myogenetic oligodeoxynucleotides (myoDNs),  
93    which are 18-base single-strand nucleotides that promote myoblast  
94    differentiation (Shinji et al., 2021; Nihashi et al., 2021). One of the myoDNs,  
95    iSN04, is directly incorporated into myoblasts and serves as an aptamer that  
96    physically interacts with nucleolin (Shinji et al., 2021). Nucleolin has been  
97    known to target the untranslated region of p53 mRNA to interfere with its  
98    translation (Takagi et al., 2005; Chen et al., 2012). In myoblasts, iSN04  
99    antagonizes nucleolin, rescues p53 protein levels, and eventually facilitates  
100   myotube formation (Shinji et al., 2021). In this study, we aimed to determine  
101   that iSN04 recovers the deteriorated differentiation of myoblasts isolated  
102   from patients with DM. This study presents iSN04 as a potential nucleic acid  
103   drug targeting myoblasts for the prevention and therapy of sarcopenic  
104   obesity.  
105

## 106 **Materials and Methods**

107

### 108 ***Chemicals***

109           The synthetic phosphorothioated iSN04 (5'-AGA TTA GGG TGA GGG  
110 TGA-3') (GeneDesign, Osaka, Japan) was dissolved in endotoxin-free water.  
111 Palmitic acid (Wako, Osaka, Japan) was dissolved in chloroform at a  
112 concentration of 600 mM (Aguer et al., 2010). An equal volume of  
113 endotoxin-free water or chloroform, without the test chemicals, served as  
114 negative controls.

115

### 116 ***Cell Culture***

117           The human myoblast (hMB) stocks (Lonza, MD, USA) were isolated  
118 from healthy subjects (CC-2580) including a 26-year-old (yo) male (H26M; lot  
119 18TL211617), a 35-yo female (H35F; lot 483427), and a 35-yo male (H35M;  
120 lot 650386), from patients with T1DM (CC-2900) including an 81-yo male  
121 (I81M; lot 211092) and an 89-yo female (I89F; lot 191810), and from patients  
122 with T2DM including a 68-yo male (II68M; lot 211384) and an 85-yo female  
123 (II85F; lot 219206). The hMBs were maintained in Skeletal Muscle Growth  
124 Media-2 (CC-3245; Lonza) as a growth medium for hMBs (hMB-GM). The  
125 murine myoblast cell line C2C12 (DS Pharma Biomedical, Osaka, Japan)  
126 was maintained in a growth medium for C2C12 cells (C2-GM) consisting of  
127 DMEM (Nacalai, Osaka, Japan) with 10% fetal bovine serum and a mixture  
128 of 100 units/ml penicillin and 100 µg/ml streptomycin (PS) (Nacalai). hMBs  
129 and C2C12 cells were differentiated in a differentiation induction medium

130 (DIM) consisting of DMEM with 2% horse serum (HyClone; GE Healthcare,  
131 UT, USA) and PS (Nihashi et al., 2019b; Shinji et al., 2021).

132 hMB-GM, C2-GM, and DIM with 5.6 mM D-glucose and 19.4 mM  
133 mannitol (hMB-GM-NG, C2-GM-NG, and DIM-NG) were used for  
134 normal-glucose culture, and those with 25 mM D-glucose (hMB-GM-HG,  
135 C2-GM-HG, and DIM-HG) were used for high-glucose culture as previously  
136 described (La Sala et al., 2015). In the experiments using high-glucose  
137 culture, hMBs were maintained in hMB-GM-HG for a total of six days with  
138 passage every three days. The cells were then seeded on fresh dishes and  
139 differentiated in DIM-HG for two days. C2C12 cells were maintained in  
140 C2-GM-HG for a total of four days with passage every two days. The cells  
141 were then seeded on fresh dishes and differentiated in DIM-HG for four days.  
142 In the palmitic acid experiments, hMBs were maintained in hMB-GM-NG;  
143 then, the cells were seeded on fresh dishes and differentiated in DIM-NG  
144 with palmitic acid at an optimal concentration of 200  $\mu$ M (for H26M) or 600  
145  $\mu$ M (for H35M) for two days, according to a previous study (Aguer et al.,  
146 2010).

147 All cells were cultured in dishes or plates coated with collagen type  
148 I-C (Cellmatrix; Nitta Gelatin, Osaka, Japan) at 37°C with 5% CO<sub>2</sub>  
149 throughout the experiments.

150

### 151 *Immunocytochemistry*

152 hMBs in hMB-GM (1.5-2.5 $\times$ 10<sup>5</sup> cells/dish optimized for 70%  
153 confluency in each cell stock) or C2C12 cells in C2-GM (10 $\times$ 10<sup>5</sup> cells/dish)

154 were seeded on 30-mm dishes. The following day, the medium was replaced  
155 with DIM containing iSN04 at an optimal concentration of 1  $\mu$ M (for H26M  
156 in hMB-DIM), 3  $\mu$ M (C2C12 cells), 10  $\mu$ M (for H26M in GM, H35M, and  
157 H85M), or 30  $\mu$ M (for H35F, I81M, I89F, and II68M). Immunocytochemistry  
158 of myoblasts was performed as previously described (Takaya et al., 2017;  
159 Nihashi et al., 2019a; Shinji et al., 2021). The myoblasts were fixed with 2%  
160 paraformaldehyde, permeabilized with 0.2% Triton X-100, and  
161 immunostained with 0.5  $\mu$ g/ml mouse monoclonal anti-MHC antibody  
162 (MF20; R&D Systems, MN, USA) and 1.0  $\mu$ g/ml rabbit polyclonal  
163 anti-nucleolin antibody (ab22758; Abcam, Cambridge, UK). 0.1  $\mu$ g/ml each of  
164 Alexa Fluor 488-conjugated donkey polyclonal anti-mouse IgG antibody and  
165 Alexa Fluor 594-conjugated donkey polyclonal anti-rabbit IgG antibody  
166 (Jackson ImmunoResearch, PA, USA) were used as secondary antibodies.  
167 Cell nuclei were stained with DAPI (Nacalai). Fluorescent images were  
168 captured using EVOS FL Auto microscope (AMAFD1000; Thermo Fisher  
169 Scientific, MA, USA). The ratio of MHC<sup>+</sup> cells was defined as the number of  
170 nuclei in the MHC<sup>+</sup> cells divided by the total number of nuclei, and the fusion  
171 index was defined as the number of nuclei in the multinuclear MHC<sup>+</sup>  
172 myotubes divided by the total number of nuclei; these were determined using  
173 ImageJ software (National Institutes of Health, USA).

174

#### 175 ***Quantitative Real-time RT-PCR (qPCR)***

176 Total RNA of the myoblasts was isolated using NucleoSpin RNA Plus  
177 (Macherey-Nagel, Düren, Germany) and reverse transcribed using ReverTra



178 Ace qPCR RT Master Mix (TOYOBO, Osaka, Japan). qPCR was performed  
179 using GoTaq qPCR Master Mix (Promega, WI, USA) with StepOne  
180 Real-Time PCR System (Thermo Fisher Scientific). The amount of each  
181 transcript was normalized to that of human glyceraldehyde 3-phosphate  
182 dehydrogenase gene (*GAPDH*) and murine 18S ribosomal RNA (*Rn18s*).  
183 Results are presented as fold-change. The primer sequences are described in  
184 [Supplementary Tables 1 and 2](#).

185

### 186 *Statistical Analyses*

187 Results are presented as the mean  $\pm$  standard error. Statistical  
188 comparisons were performed using unpaired two-tailed Student's *t*-test or  
189 multiple comparison test with Tukey-Kramer test following one-way analysis  
190 of variance. Statistical significance was set at  $p < 0.05$ .

191

192 **Results**

193

194 ***DM Deteriorates Myoblast Differentiation***

195         The hMBs isolated from healthy subjects (H26M, H35F, and H35M),  
196 patients with T1DM (I81M and I89F), and patients with T2DM (II68M and  
197 II85F) were cultured in the hMB-GM-NG ([Supplementary Figure S1](#)). These  
198 hMBs varied in cell size and morphology, but DM-dependent hallmarks were  
199 not observed. The hMBs induced myogenic differentiation in DIM-NG,  
200 followed by immunostaining for MHC, a terminal differentiation marker of  
201 muscle cells. The ratio of MHC<sup>+</sup> cells and multinuclear myotubes was  
202 quantified on days 0, 2, and 4 of differentiation ([Supplementary Figure S2](#)).  
203 On day 2 ([Figure 1](#)), the ratio of MHC<sup>+</sup> cells of H35M was lower than that of  
204 H26M and H35F, indicating the individuality of myogenesis among healthy  
205 subjects. I81M differentiated to the same extent as H26M and H35F, but  
206 I89F, II68M, and II85F exhibited deteriorated differentiation. In particular,  
207 I89F and II85F were exacerbated in myotube formation compared to all  
208 healthy subjects. These results indicate that myoblast differentiation is  
209 aggravated in patients with DM.

210         Gene expression patterns in hMBs were examined using qPCR  
211 ([Figure 2A](#)). Among undifferentiated myoblast markers, *PAX7* was expressed  
212 2-3 times higher in T2DM myoblasts throughout differentiation, but *PAX3*  
213 and *MYF5* were not. A myogenic transcription factor, *MYOD1*, was highly  
214 induced in T1DM myoblasts, but a terminal transcription factor, myogenin  
215 (*MYOG*), was not. The mRNA levels of embryonic MHC (*MYH3*) were not

216 significantly different among hMBs. The transcription levels of these genes  
217 frequently vary among patients, which reflects individual differences.  
218 During myogenic differentiation, the ratios of Pax7, MyoD, and myogenin  
219 are critically important. Proliferating myoblasts express both Pax7 and  
220 MyoD, but not myogenin. At the initial stage of differentiation, Pax7  
221 disappears, and MyoD drives myogenin transcription. In terminally  
222 differentiated myocytes, MyoD decreases, and myogenin becomes a  
223 dominant transcription factor (Dumont et al., 2015). qPCR data indicated  
224 that *MYOD1/PAX7* and *MYOG/MYOD1* ratios were lower in T2DM and  
225 T1DM myoblasts than those in healthy myoblasts (Figure 2B),  
226 demonstrating a delayed shift of myogenic transcription factors in DM  
227 patients. This may be one of the reasons for the deteriorated differentiation  
228 of DM myoblasts.

229

### 230 *ILs Are Induced in T2DM Myoblasts*

231 The mRNA levels of atrogenin-1 (*FBXO32*), MuRF-1 (*TRIM63*),  
232 myostatin (*MSTN*), and myostatin receptor (*ACVR2B*), which are involved in  
233 ubiquitin-proteasome-mediated muscle atrophy (Bodine et al., 2001;  
234 Lokireddy et al., 2011), were not different among the hMBs. In contrast,  
235 transcription of the myostatin antagonist, follistatin (*FST*), was flat in T1DM  
236 myoblasts during differentiation (Supplementary Figure S3).

237 Sterol regulatory element-binding proteins (*SREBF1* and *SREBF2*),  
238 fatty acid synthase (*FASN*), receptor substrates (*IRS1* and *IRS2*), glucose  
239 transporter 4 (*SLC2A4*), mitochondrial carnitine palmitoyltransferase 2

240 (*CPT2*), and thioredoxin interacting protein (*TXNIP*) are insulin  
241 resistance-related factors and involved in differentiation and fatty acid  
242 metabolism of muscle cells (Parikh et al., 2007; Kato et al., 2008; Lecomte et  
243 al., 2010; Boufroua et al., 2018). However, their mRNA levels were not  
244 significantly altered in T2DM myoblasts (Supplementary Figure S4).

245 T2DM myoblasts have been reported to display abnormal  
246 inflammatory responses (Green et al., 2011). Indeed, mRNA levels of *IL1B*  
247 were 6-7 times higher in T2DM myoblasts than those in healthy myoblasts  
248 on days 2 and 4 (Figure 2C). In contrast, inflammatory factors, NF- $\kappa$ B p50  
249 (*NFKB1*) and p65 (*RELA*) subunits, TNF- $\alpha$  (*TNF*), interferon  $\gamma$  (*IFNG*), and  
250 *IL6* were not upregulated in T2DM myoblasts. Although *IL8* (*CXCL8*) levels  
251 were high in H26M on day 0, T2DM myoblasts exhibited higher *IL8* mRNA  
252 levels than those did healthy myoblasts (Supplementary Figure S5). It has  
253 been reported that IL-1 $\beta$  inhibits insulin-like growth factor (IGF)-dependent  
254 myoblast differentiation (Broussard et al., 2004), and IL-8 is secreted from  
255 insulin-resistant myotubes (Bouzakri et al., 2011). Thus, the upregulation of  
256 IL-1 $\beta$  and IL-8 potentially impaired the shift in myogenic transcription  
257 factors and subsequent differentiation of T2DM myoblasts.

258

### 259 *myoDN Recovers Differentiation of DM Myoblasts*

260 We recently identified the single-strand myogenetic  
261 oligodeoxynucleotides (myoDNs) that promote myoblast differentiation by  
262 antagonizing nucleolin (Shinji et al., 2021). To assess the applicability of  
263 myoDN to DM myoblasts, the hMBs used in this study were treated with

264 iSN04, which exhibits the highest myogenetic activity among the myoDNs.  
265 iSN04 significantly facilitated the differentiation and myotube formation of  
266 H35F, H35M, I81M, I89F, and II85F (Figure 3). In particular, iSN04  
267 recovered the attenuated differentiation of II85F to almost the same extent  
268 as that of healthy myoblasts. iSN04 did not affect the differentiation of  
269 H26M in DIM, but significantly promoted myotube formation in hMB-GM  
270 (Supplementary Figure S6). In contrast, differentiation of II68M was not  
271 altered by iSN04, suggesting the distinct sensitivity or efficacy of iSN04  
272 among individuals. These results indicate that iSN04 is able to recover the  
273 deteriorated differentiation of DM myoblasts. qPCR revealed that iSN04  
274 treatment significantly reduced *PAX7* and *MSTN* mRNA levels in II85F,  
275 resulting in the recovery transcription of *MYH3* (Figure 4A). An  
276 iSN04-dependent decrease in *MSTN* expression was also detected in H35F.  
277 Furthermore, iSN04 significantly suppressed the *IL1B* levels in H35F and  
278 the *IL8* levels induced in II85F (Figure 4B). These results indicate that  
279 iSN04 facilitates the differentiation in both healthy and diabetic myoblasts,  
280 in part, by modulating the expression of cytokines including myostatin and  
281 ILs.

282

### 283 *myoDN Recovers the Myoblast Differentiation Impaired by Excessive* 284 *Glucose*

285 The DM myoblasts used in this study were isolated from elderly  
286 patients (68, 81, 85, and 89-yo) whose ages were significantly higher than  
287 those of the healthy subjects (26, 35, and 35-yo) ( $p < 0.01$ ; Student's *t*-test).

288 Aging is a factor that compromises myoblast differentiation (Brack et al.,  
289 2007). To investigate the impact of DM without aging on myogenesis, we  
290 cultured and differentiated myoblasts in a high glucose concentration  
291 mimicking hyperglycemia. C2C12 cells maintained in high-glucose media  
292 exhibited a decreased ratio of MHC<sup>+</sup> cells and myotubes (Figure 5A). qPCR  
293 revealed that high-glucose culture significantly induced *Mstn* and  
294 suppressed *Myog* and *Myh3* expression in C2C12 cells on differentiation day  
295 1 (Figure 5B). It is noteworthy that *I11b* mRNA levels were not elevated by  
296 excessive glucose. High-glucose culture also significantly abrogated the  
297 myogenesis of H26M and H35F (Figure 5A). These data demonstrated that  
298 excessive glucose is an independent factor for the deterioration of myoblast  
299 differentiation.

300 Importantly, iSN04 treatment significantly recovered myogenic  
301 differentiation and myotube formation in C2C12 cells exposed to high  
302 glucose concentrations (Figure 6). This result corresponds well with the  
303 phenotype of the iSN04-treated T2DM myoblasts, indicating that myoDNs  
304 are potential candidates for nucleic acid drugs that activate myoblasts in  
305 hyperglycemic patients.

306

### 307 ***myoDN Recovers the Myoblast Differentiation Impaired by Palmitic Acid***

308 Patients with T2DM are frequently present with hyperlipidemia.  
309 Palmitic acid is the most abundant intravital fatty acid, which is involved in  
310 insulin resistance and C2C12 cell differentiation (Yang et al., 2013; Saini et  
311 al., 2017). To examine the impact of excessive fatty acids on hMBs, H26M

312 and H35M were induced to differentiate in DIM-NG with palmitic acid. In  
313 both hMBs, palmitic acid significantly impaired myogenic differentiation and  
314 myotube formation (Figure 7A). qPCR showed that palmitic acid decreased  
315 the *MYOG/MYOD1* ratio, resulting in lower *MYH3* expression in H35M  
316 (Figure 7B). Palmitic acid also upregulated *IL1B* and *IL8* mRNA levels  
317 without altering *NFKB1*, *RELA*, and *TNF* (Figure 7C), which recapitulated  
318 the phenotype of T2DM myoblasts. These results indicate that excessive  
319 fatty acids can inhibit myoblast differentiation by inducing inflammatory  
320 cytokines.

321 iSN04 treatment significantly improved the differentiation into  
322 MHC<sup>+</sup> cells from palmitic acid-treated H35M (Figure 8A). As shown in  
323 Figure 8B, iSN04 induced *MYOD1* and *MYOG* expression under basal  
324 conditions, but not in the presence of palmitic acid. In contrast, iSN04  
325 significantly reduced *MSTN* mRNA levels regardless of the presence of  
326 palmitic acid. iSN04 further suppressed palmitic acid-induced *IL8*  
327 transcription. These results show that myoDNs conceivably recover myoblast  
328 differentiation attenuated by excessive fatty acids in hyperlipidemic  
329 patients.

330

331 **Discussion**

332

333 This study provides evidence that the myoDN, iSN04, ameliorates  
334 the differentiation of DM myoblasts, and presents a novel therapeutic  
335 strategy for sarcopenic obesity. Dysfunction of DM myoblasts is caused by  
336 various pathophysiological factors such as inflammation (D'Souza et al.,  
337 2013; Teng and Huang, 2019) and it can be one of the reasons for muscle  
338 atrophy. A decreased number of satellite cells has been reported in patients  
339 with T1DM (D'Souza et al., 2016). Our results further showed the impaired  
340 myogenic ability of T1DM myoblasts with a delayed shift to  
341 myogenin-dominant transcription. A similar attenuation of myogenesis has  
342 been reported in T2DM myoblasts (Henriksen et al., 2017; Henriksen et al.,  
343 2019). The T2DM myoblasts used in this study exhibited a diminished ratio  
344 of MyoD/Pax7 and elevated levels of IL-1 $\beta$  and IL-8, which may contribute to  
345 the incompetent differentiation. As many patients with T2DM are  
346 accompanied by hyperlipidemia in addition to hyperglycemia, surplus  
347 glucose and fatty acids are considered the major molecules that interfere  
348 with myoblast differentiation. In this study, excessive glucose upregulated  
349 myostatin and downregulated myogenin and MHC in C2C12 cells, which is  
350 consistent with that reported in previous studies (Grzelkowska-Kowalczyk et  
351 al., 2013; Jeong et al., 2013). Similarly, high-glucose culture inhibited  
352 myogenesis of plural healthy hMBs. This demonstrates that glucose is an  
353 independent factor for myoblast dysfunction, which modulates myogenic  
354 gene expression. However, high-glucose culture did not induce IL-1 $\beta$ .



355 Palmitic acid inhibits myokine expression and C2C12 cell differentiation  
356 (Yang et al., 2013; Saini et al., 2017). We showed that palmitic acid abrogates  
357 the differentiation of healthy hMBs by upregulating IL-1 $\beta$  and IL-8. IL-1 $\beta$  is  
358 known to inhibit IGF-induced myogenin expression and myogenesis  
359 (Broussard et al., 2004). IL-8 is a chemokine that contributes to insulin  
360 resistance in patients with T2DM (Kim et al., 2006; Samaras et al., 2010)  
361 and is also a myokine released from skeletal muscle cells. Insulin-resistant  
362 human myotubes secrete higher levels of IL-8 (Bouzakri et al., 2011). The  
363 role of IL-8 in myoblast differentiation remains controversial.  
364 IL-8-neutralizing antibody impairs the differentiation of hMBs (Polesskaya  
365 et al., 2016). In contrast, IL-8 treatment decreases the myogenin/MyoD ratio  
366 and embryonic MHC expression in rat myoblasts (Milewska et al., 2019). An  
367 appropriate level of IL-8 is important for normal myogenesis. Perturbation of  
368 IL-8 in T2DM and palmitic acid-cultured myoblasts may be linked to  
369 deteriorated differentiation. The mechanism of IL induction in myoblasts  
370 remains unclear. NF- $\kappa$ B p65 and TNF- $\alpha$  have been reported to be elevated in  
371 T2DM myoblasts (Green et al., 2011). However, in this study, mRNA levels of  
372 these genes were not altered by T2DM or palmitic acid. The signaling  
373 pathway of fatty acid-dependent IL induction needs to be clarified in further  
374 studies.

375 This study proved that iSN04 can recover the deteriorated  
376 myogenesis of DM myoblasts, in addition to facilitating the differentiation of  
377 healthy myoblasts. Although myoDNs, including iSN04, can be potential  
378 drug seeds for sarcopenic obesity, the effect of iSN04 should be established

379 using extensive patient-derived myoblasts for clinical application. For  
380 instance, the sensitivities to iSN04 were individually different among hMBs.  
381 iSN04 is incorporated into the cytoplasm and physically interacts with and  
382 interfere with a multifunctional phosphoprotein, nucleolin (Shinji et al.,  
383 2021). Nucleolin (*NCL*) mRNA levels were similar among the hMBs used in  
384 this study (Supplementary Figure S7A), and subcellular localization of  
385 nucleolin was not different between insensitive H26M and sensitive H35F  
386 throughout differentiation (Supplementary Figure S7B). Post-translational  
387 phosphorylation or glycosylation is indispensable for nucleolin function  
388 (Barel et al., 2001; Losfeld et al., 2009). This suggests that the modification  
389 of nucleolin may vary among individuals and may be related to iSN04  
390 sensitivity. The precise role of nucleolin in myoblasts remains unclear. One  
391 study reported that a moderate knockdown of nucleolin by miR-34b promotes  
392 myoblast differentiation (Tang et al., 2017). We found that iSN04 serves as a  
393 nucleolin antagonist and increases p53 protein levels to promote myoblast  
394 differentiation (Shinji et al., 2021) because nucleolin binds to p53 mRNA to  
395 inhibit its translation (Takagi et al., 2005; Chen et al., 2012). However,  
396 inhibition of p53 translation is considered to be a part of the multifunction of  
397 nucleolin in myoblasts. In cancer cells, nucleolin competitively interacts with  
398 NF- $\kappa$ B essential modulator (NEMO), resulting in the downregulation of  
399 NF- $\kappa$ B activity. The established nucleolin aptamer AS1411 forms the  
400 NEMO-nucleolin-AS1411 complex to block the transcriptional activity of  
401 NF- $\kappa$ B (Girvan et al., 2006). We have already confirmed that AS1411  
402 promotes myoblast differentiation as well as iSN04 (Shinji et al., 2021). Thus,

403 iSN04 possibly inhibits NF- $\kappa$ B activity by associating the  
404 NEMO-nucleolin-iSN04 complex. NF- $\kappa$ B has been known to impair  
405 myogenesis by upregulating Pax7 and myostatin (Wang et al., 2007; He et al.,  
406 2013; Ono and Sakamoto, 2017). Inactivation of NF- $\kappa$ B by iSN04 can be  
407 assumed to downregulate myostatin and IL-8 in T2DM and palmitic  
408 acid-cultured myoblasts. Investigation of anti-inflammatory effects of iSN04  
409 and AS1411 in myoblasts should be an important subject to reveal their  
410 action mechanism and to establish the myoDNs as nucleic acid drugs for  
411 sarcopenic obesity.

412

### 413 **Conclusion**

414 The differentiation abilities of myoblasts deteriorated with  
415 dysregulation of myogenic and inflammatory gene expression due to DM,  
416 glucose, or palmitic acid. A myoDN, iSN04, recovered impaired myogenesis  
417 by modulating gene expression, especially by decreasing myostatin and IL-8.  
418 iSN04 could be a potential drug candidate for sarcopenic obesity by directly  
419 targeting myoblasts.

420

421 **Author Contributions**

422 TT and SN designed the study. TT wrote the manuscript. SN  
423 performed experiments and analyses. SY and TS provided the materials and  
424 supervised the study.

425

426 **Funding**

427 This study was supported in part by a Grant-in-Aid from The Japan  
428 Society for the Promotion of Science (19K05948) to TT.

429

430 **Conflict of Interest**

431 Shinshu University has been assigned the invention of iSN04 by TT,  
432 Koji Umezawa, and TS, and Japan Patent Application 2018-568609 has been  
433 filed on February 15, 2018.

434

435 **References**

436

437 Aguer, C., Mercier, J., Man, C. Y., Metz, L., Bordenave, S., Lambert, K., et al.  
438 (2010). Intramyocellular lipid accumulation is associated with permanent  
439 relocation ex vivo and in vitro of fatty acid translocase (FAT)/CD36 in  
440 obese patients. *Diabetologia* 53, 1151-1163. doi:  
441 10.1007/s00125-010-1708-x

442 Anker, S. D., Ponikowski, P., Varney, S., Chua, T. P., Clark, A. L.,  
443 Webb-Peploe, K. M., et al. (1997). Wasting as independent risk factor for  
444 mortality in chronic heart failure. *Lancet* 349, 1050-1053. doi:  
445 10.1016/s0140-6736(96)07015-8

446 Barel, M., Le Romancer, M., and Frade, R. (2001). Activation of the EBV/C3d  
447 receptor (CR2, CD21) on human B lymphocyte surface triggers tyrosine  
448 phosphorylation of the 95-kDa nucleolin and its interaction with  
449 phosphatidylinositol 3 kinase. *J. Immunol.* 166, 3167-3173. doi:  
450 10.4049/jimmunol.166.5.3167

451 Blauwhoff-Buskermolen, S., Versteeg, K. S., de van der Schueren, M. A., den  
452 Braver, N. R., Berkhof, J., Langius, J. A., et al. (2016). Loss of muscle mass  
453 during chemotherapy is predictive for poor survival of patients with  
454 metastatic colorectal cancer. *J. Clin. Oncol.* 34, 1339-1344. doi:  
455 10.1200/JCO.2015.63.6043

456 Bodine, S. C., Latres, E., Baumhueter, S., Lai, V. K., Nunez, L., Clarke, B. A.,  
457 et al. (2001). Identification of ubiquitin ligases required for skeletal  
458 muscle atrophy. *Science* 294, 1704-1708. doi: 10.1126/science.1065874

- 459 Boufroua, F. Z., Le Bachelier, C., Tomkiewicz-Raulet, C., Schlemmer, D.,  
460 Benoist, J. F., Grondin, P., et al. (2018). A new AMPK activator, GSK773,  
461 corrects fatty acid oxidation and differentiation defect in CPT2-deficient  
462 myotubes. *Hum. Mol. Genet.* 27, 3417-3433. doi: 10.1093/hmg/ddy254
- 463 Bouzakri, K., Plomgaard, P., Berney, T., Donath, M. Y., Pedersen, B. K.,  
464 Halban, P. A. (2011). Bimodal effect on pancreatic beta-cells of secretory  
465 products from normal or insulin-resistant human skeletal muscle.  
466 *Diabetes* 60, 1111-1121. doi: 10.2337/db10-1178
- 467 Brack, A.S., Conboy, M. J., Roy, S., Lee, M., Kuo, C. J., Keller, C., et al. (2007).  
468 Increased Wnt signaling during aging alters muscle stem cell fate and  
469 increases fibrosis. *Science* 317, 807-810. doi: 10.1126/science.1144090
- 470 Broussard, S. R., McCusker, R. H., Novakofski, J. E., Strle, K., Shen, W. H.,  
471 Johnson, R. W., et al. (2004). IL-1 $\beta$  impairs insulin-like growth factor  
472 I-induced differentiation and downstream activation signals of the  
473 insulin-like growth factor I receptor in myoblasts
- 474 Chen, J., Guo, K., and Kastan, M. B. (2012). Interactions of nucleolin and  
475 ribosomal protein L26 (RPL26) in translational control of human p53  
476 mRNA. *J. Biol. Chem.* 287, 16467-16476. doi: 10.1074/jbc.M112.349274
- 477 Ciaraldi, T. P., Ryan, A. J., Mudaliar, S. R., and Henry, R. R. (2016). Altered  
478 myokine secretion is an intrinsic property of skeletal muscle in type 2  
479 diabetes. *PLoS One* 11, e0158209. doi: 10.1371/journal.pone.0158209
- 480 D'Souza, D. M., Al-Sajee, D., and Hawke, T. J. (2013). Diabetic myopathy:  
481 impact of diabetes mellitus on skeletal muscle progenitor cells. *Front.*  
482 *Physiol.* 4, 379. doi: 10.3389/fphys.2013.00379

- 483 D'Souza, D. M., Zhou, S., Rebalka, I. A., MacDonald, B., Moradi, J., Krause,  
484 M. P., et al. (2016). Decreased satellite cell number and function in  
485 humans and mice with type 1 diabetes is the result of altered Notch  
486 signaling. *Diabetes* 65, 3053-3061. doi: 10.2337/db15-1577
- 487 Dumont, N. A., Bentzinger, C. F., Sincennes, M. C., and Rudnicki, M. A.  
488 (2015). Satellite cells and skeletal muscle regeneration. *Compr. Physiol.* 5,  
489 1027-1059. doi: 10.1002/cphy.c140068
- 490 Fukada, S. I. (2018). The roles of muscle stem cells in muscle injury, atrophy  
491 and hypertrophy. *J. Biochem.* 163, 353-358. doi: 10.1093/jb/mvy019
- 492 Green, C. J., Pedersen, M., Pedersen, B. K., Scheele, C. (2011). Elevated  
493 NF- $\kappa$ B activation is conserved in human myocytes cultured from obese  
494 type 2 diabetic patients and attenuated by AMP-activated protein kinase.  
495 *Diabetes* 60, 2810-2819. doi: 10.2337/db11-0263
- 496 Girvan, A. C., Teng, Y., Casson, L. K., Thomas, S. D., Juliger, S., Ball, M. W.,  
497 et al. (2006). AGRO100 inhibits activation of nuclear factor- $\kappa$ B (NF- $\kappa$ B) by  
498 forming a complex with NF- $\kappa$ B essential modulator (NEMO) and nucleolin.  
499 *Mol. Cancer Ther* 5, 1790-1799. doi: 10.1158/1535-7163.MCT-05-0361
- 500 Grzelkowska-Kowalczyk, K., Wieteska-Skrzeczynska, W., Grabiec, K.,  
501 Tokarska, J. (2013). High glucose-mediated alterations of mechanisms  
502 important in myogenesis of mouse C2C12 myoblasts. *Cell Biol. Int.* 37,  
503 29-35. doi: 10.1002/cbin.10004
- 504 He, W. A., Berardi, E., Cardillo, V. M., Acharyya, S., Aulino, P.,  
505 Thomas-Ahner, J., et al. (2013). NF- $\kappa$ B-mediated Pax7 dysregulation in

506 the muscle microenvironment promotes cancer cachexia. *J. Clin. Invest.*  
507 123, 4821-4835. doi: 10.1172/JCI68523

508 Henriksen, T. I., Davidsen, P. K., Pedersen, M., Schultz, H. S., Hansen, N. S.,  
509 Larsen, T. J., et al. (2017). Dysregulation of a novel miR-23b/27b-p53 axis  
510 impairs muscle stem cell differentiation of humans with type 2 diabetes.  
511 *Mol. Metab.* 6, 770-779. doi: 10.1016/j.molmet.2017.04.006

512 Henriksen, T. I., Wigge, L. V., Nielsen, J., Pedersen, B. K., Sandri, M., and  
513 Scheele, C. (2019). Dysregulated autophagy in muscle precursor cells from  
514 humans with type 2 diabetes. *Sci. Rep.* 9, 8169. doi:  
515 10.1038/s41598-019-44535-2

516 Jeong, J., Conboy, M. J., Conboy, I. M. (2013). Pharmacological inhibition of  
517 myostatin/TGF-beta receptor/pSmad3 signaling rescues muscle  
518 regenerative responses in mouse model of type 1 diabetes. *Acta Pharmacol.*  
519 *Sin.* 34, 1052-1060. doi: 10.1038/aps.2013.67

520 Kato, T., Shimano, H., Yamamoto, T., Ishikawa, M., Kumadaki, S.,  
521 Matsuzaka, T., et al. (2008). Palmitic acid impairs and eicosapentaenoate  
522 restores insulin secretion through regulation of SREBP-1c in pancreatic  
523 islets. *Diabetes* 57, 2382-2392. doi: 10.2337/db06-1806

524 Kim, C. S., Park, H. S., Kawada, T., Kim, J. H., Lim, D., Hubbard, N. E., et al.  
525 (2006). Circulating levels of MCP-1 and IL-8 are elevated in human obese  
526 subjects and associated with obesity-related parameters. *Int. J. Obes.* 30,  
527 1347-1355. doi: 10.1038/sj.ijo.0803259

528 La Sala, L., Pujadas, G., De Nigris, V., Canivell, S., Novials, A., Genovese, S.,  
529 et al. (2015). Oscillating glucose and constant high glucose induce



- 530 endoglin expression in endothelial cells: the role of oxidative stress. *Acta*  
531 *Diabetol.* 52, 505-512. doi: 10.1007/s00592-014-0670-3
- 532 Lecomte, V., Meugnier, E., Euthine, V., Durand, C., Freyssenet, D., Nemoz,  
533 G., et al. (2010). A new role for sterol regulatory element binding protein 1  
534 transcription factors in the regulation of muscle mass and muscle cell  
535 differentiation. *Mol. Cell. Biol.* 30, 1182-1198. doi: 10.1128/MCB.00690-09
- 536 Lokireddy, S., Mouly, V., Butler-Browne, G., Gluckman, P. D., Sharma, M.,  
537 Kambadur, R., et al. (2011). Myostatin promotes the wasting of human  
538 myoblast cultures through promoting ubiquitin-proteasome  
539 pathway-mediated loss of sarcomeric proteins. *Am. J. Physiol. Cell Physiol.*  
540 301, C1316-C1324. doi: 10.1152/ajpcell.00114.2011
- 541 Losfeld, M. E., Khoury, D. E., Mariot, P., Carpentier, M., Krust, B., Briand, J.  
542 P., et al. (2009). The cell surface expressed nucleolin is a glycoprotein that  
543 triggers calcium entry into mammalian cells. *Exp. Cell Res.* 315, 357-369.  
544 doi: 10.1016/j.yexcr.2008.10.039
- 545 McCormick, R., and Vasilaki, A. (2018). Age-related changes in skeletal  
546 muscle: changes to life-style as a therapy. *Biogerontology* 19, 519-536. doi:  
547 10.1007/s10522-018-9775-3
- 548 Milewska, M., Domoradzki, T., Majewska, A., Blaszczyk, M., Gajewska, M.,  
549 Hulanicka, M., et al. (2019). Interleukin-8 enhances myocilin expression,  
550 Akt-FoxO3 signaling and myogenic differentiation in rat skeletal muscle  
551 cells. *J. Cell. Physiol.* 234, 19675-19690. doi: 10.1002/jcp.28568
- 552 Miyake, H., Kanazawa, I., Tanaka, K. I., Sugimoto, T. (2019). Low skeletal  
553 muscle mass is associated with the risk of all-cause mortality in patients

- 554 with type 2 diabetes mellitus. *Ther. Adv. Endocrinol. Metab.* 10:  
555 2042018819842971. doi: 10.1177/2042018819842971
- 556 Nihashi, Y., Ono, T., Kagami, H., and Takaya, T. (2019a). Toll-like receptor  
557 ligand-dependent inflammatory responses in chick skeletal muscle  
558 myoblasts. *Dev. Comp. Immunol.* 91, 115-122. doi:  
559 10.1016/j.dci.2018.10.013.
- 560 Nihashi, Y., Shinji, S., Umezawa, K., Shimosato, T., Ono, T., Kagami, H., et al.  
561 (2021). Myogenetic oligodeoxynucleotide (myoDN) complexed with  
562 berberine promotes differentiation of chicken skeletal muscle myoblasts.  
563 *bioRxiv* doi: doi.org/10.1101/2020.12.19.423622.
- 564 Nihashi, Y., Umezawa, K., Shinji, S., Hamaguchi, Y., Kobayashi, H., Kono, T.,  
565 et al. (2019b). Distinct cell proliferation, myogenic differentiation, and  
566 gene expression in skeletal muscle myoblasts of layer and broiler chickens.  
567 *Sci. Rep.* 9, 16527. doi: 10.1038/s41598-019-52946-4
- 568 Ono, Y., Sakamoto, K. (2017). Lipopolysaccharide inhibits myogenic  
569 differentiation of C2C12 myoblasts through the Toll-like receptor  
570 4-nuclear factor- $\kappa$ B signaling pathway and myoblast-derived tumor  
571 necrosis factor- $\alpha$ . *PLoS One* 12, e0182040. doi:  
572 10.1371/journal.pone.0182040
- 573 Parikh, H., Carlsson, E., Chutkow, W. A., Johansson, L. E., Storgaard, H.,  
574 Poulsen, P., et al. (2007). TXNIP regulates peripheral glucose metabolism  
575 in humans. *PLoS Med.* 4, e158. doi: 10.1371/journal.pmed.0040158
- 576 Polesskaya, A., Pinna, G., Sassi, Y., Vandamme, M., Bigot, A., Mouly, V., et al.  
577 (2016). Post-transcriptional modulation of interleukin 8 by CNOT6L

- 578 regulates skeletal muscle differentiation. *Biochim. Biophys. Acta* 1863,  
579 263-270. doi: 10.1016/j.bbamcr.2015.11.018
- 580 Saini, A., Sharples, A. P., Al-Shadai, N., and Stewart, C. E. (2017). Omega-3  
581 fatty acid EPA improves regenerative capacity of mouse skeletal muscle  
582 cells exposed to saturated fat and inflammation. *Biogerontology*. 18:  
583 109-129. doi: 10.1007/s10522-016-9667-3
- 584 Samaras, K., Botelho, N. K., Chisholm, D. J., Lord, R. V. (2010).  
585 Subcutaneous and visceral adipose tissue gene expression of serum  
586 adipokines that predict type 2 diabetes. *Obesity* 18, 884-889. doi:  
587 10.1038/oby.2009.443
- 588 Seo, K., Suzuki, T., Kobayashi, K., and Nishimura, T. (2019). Adipocytes  
589 suppress differentiation of muscle cells in a co-culture system. *Anim. Sci. J.*  
590 90, 423-434. doi: 10.1111/asj.13145
- 591 Shinji, S., Umezawa, K., Nihashi, Y., Nakamura, S., Shimosato, T., and  
592 Takaya, T. (2021). Identification of the myogenetic oligodeoxynucleotides  
593 (myoDNs) that promote differentiation of skeletal muscle myoblasts by  
594 targeting nucleolin. *Front. Cell Dev. Biol.* 8, 616706. doi:  
595 10.3389/fcell.2020.616706
- 596 Takagi, M., Absalon, M. J., McLure, K. G., and Kastan, M. B. (2005).  
597 Regulation of p53 translation and induction after DNA damage by  
598 ribosomal protein L26 and nucleolin. *Cell* 123, 49-63. doi:  
599 10.1016/j.cell.2005.07.034

- 600 Takaya, T., Nihashi, Y., Kojima, S., Ono, T., and Kagami, H. (2017).  
601 Autonomous xenogenic cell fusion of murine and chick skeletal muscle  
602 myoblasts. *Anim. Sci. J.* 88, 1880-1885. doi: 10.1111/asj.12884
- 603 Tang, Z., Qiu, H., Luo, L., Liu, N., Zhong, J., Kang, K., et al. (2017). miR-34b  
604 modulates skeletal muscle cell proliferation and differentiation. *J. Cell.*  
605 *Biochem.* 118, 4285-4295. doi: 10.1002/jcb.26079
- 606 Teng, S., and Huang, P. (2019). The effect of type 2 diabetes mellitus and  
607 obesity on muscle progenitor cell function. *Stem Cell Res. Ther.* 10, 103.  
608 doi: 10.1186/s13287-019-1186-0
- 609 Wang, H., Hertlein, E., Bakkar, N., Sun, H., Acharyya, S., Wang, J., et al.  
610 (2007). NF- $\kappa$ B regulation of YY1 inhibits skeletal myogenesis through  
611 transcriptional silencing of myofibrillar genes. *Mol. Cell. Biol.* 27,  
612 4374-4387. doi: 10.1128/MCB.02020-06
- 613 Wang, M., Tan, Y., Shi, Y., Wang, X., Liao, Z., and Wei, P. (2020). Diabetes  
614 and sarcopenic obesity: Pathogenesis, diagnosis, and treatments. *Front.*  
615 *Endocrinol.* 11, 568. doi: 10.3389/fendo.2020.00568
- 616 Yang, M., Wei, D., Mo, C., Zhang, J., Wang, X., Han, X., et al. (2013).  
617 Saturated fatty acid palmitic acid-induced insulin resistance is  
618 accompanied with myotube loss and the impaired expression of health  
619 benefit myokine genes in C2C12 myotubes. *Lipids Health Dis.* 12, 104. doi:  
620 10.1186/1476-511X-12-104
- 621

622 **Figure Legends**

623

624 **Figure 1.** Attenuated myogenic differentiation of DM myoblasts.  
625 Representative immunofluorescent images of the hMBs differentiated in  
626 DIM-NG for two days. Scale bar, 200  $\mu$ m. Ratio of MHC<sup>+</sup> cells and  
627 multinuclear myotubes were quantified. Orange dashed lines indicate the  
628 mean values of H26M, H35F, and H35M. \*  $p < 0.05$ , \*\*  $p < 0.01$  vs. H26M; ††  
629  $p < 0.01$  vs. H35F; #  $p < 0.05$ , ###  $p < 0.01$  vs. H35M (Tukey-Kramer test).  $n = 6$ .

630

631 **Figure 2.** Gene expression patterns altered in DM myoblasts. (A-C) qPCR  
632 results of gene expression in the hMBs differentiated in DIM-NG on days 0,  
633 2, and 4. Bars indicate mean values of each group. The mean value of  
634 healthy myoblasts at day 0 was set to 1.0 for each gene.

635

636 **Figure 3.** iSN04 recovers the differentiation of DM myoblasts.  
637 Representative immunofluorescent images of the hMBs differentiated in  
638 DIM-NG with iSN04 for two days. Scale bar, 200  $\mu$ m. Ratio of MHC<sup>+</sup> cells  
639 and multinuclear myotubes were quantified. \*  $p < 0.05$ , \*\*  $p < 0.01$  vs.  
640 iSN04(-) in each group (Student's  $t$ -test).  $n = 4-6$ .

641

642 **Figure 4.** iSN04 suppresses myostatin expression. (A and B) qPCR results of  
643 gene expression in the H35F and II85F myoblasts differentiated in DIM-NG  
644 with iSN04 for two days. Mean value of H35F-iSN04(-) group was set to 1.0

645 for each gene. \*  $p < 0.05$ , \*\*  $p < 0.01$  vs. iSN04(-) in each myoblast (Student's  
646  $t$  test).  $n = 3$ .

647

648 **Figure 5.** High glucose concentration deteriorates myoblast differentiation.

649 **(A)** Representative immunofluorescent images of the C2C12, H26M, and

650 H35F myoblasts differentiated in DIM-NG or -HG. Scale bar, 200  $\mu\text{m}$ . Ratio

651 of MHC<sup>+</sup> cells and multinuclear myotubes were quantified. \*  $p < 0.05$ , \*\*  $p <$

652 0.01 vs. NG (Student's  $t$  test).  $n = 4-6$ . **(B)** qPCR results of myogenic gene

653 expression in the C2C12 cells differentiated in DIM for 1 day. Mean value of

654 NG group was set to 1.0 for each gene. \*  $p < 0.05$ , \*\*  $p < 0.01$  vs. NG

655 (Student's  $t$  test).  $n = 3$ .

656

657 **Figure 6.** iSN04 recovers the myoblast differentiation impaired by excessive

658 glucose. Representative immunofluorescent images of the C2C12 cells

659 differentiated in DIM with iSN04 for four days. Scale bar, 200  $\mu\text{m}$ . Ratio of

660 MHC<sup>+</sup> cells and multinuclear myotubes were quantified. \*  $p < 0.05$ , \*\*  $p <$

661 0.01 vs. NG-iSN04(-); ††  $p < 0.01$  vs. HG-iSN04(-) (Tukey-Kramer test).  $n = 4$ .

662

663 **Figure 7.** Palmitic acid deteriorates myoblast differentiation. **(A)**

664 Representative immunofluorescent images of the H26M and H35F

665 myoblasts differentiated in DIM-NG with palmitic acid (PA) for two days.

666 Scale bar, 200  $\mu\text{m}$ . Ratio of MHC<sup>+</sup> cells and multinuclear myotubes were

667 quantified. \*\*  $p < 0.01$  vs. control (Student's  $t$  test).  $n = 4-6$ . **(B and C)** qPCR

668 results of gene expression in the H35M myoblasts differentiated in DIM-NG

669 with palmitic acid for two days. Mean value of control group was set to 1.0 for  
670 each gene.  $n = 1$ .

671

672 **Figure 8.** iSN04 recovers the myoblast differentiation impaired by excessive  
673 palmitic acid. **(A)** Representative immunofluorescent images of the H35M  
674 myoblasts differentiated in DIM-NG with palmitic acid and iSN04 for two  
675 days. Scale bar, 200  $\mu\text{m}$ . Ratio of MHC<sup>+</sup> cells and multinuclear myotubes  
676 were quantified. \*\*  $p < 0.01$  vs. control-iSN04(-); ††  $p < 0.01$  vs. PA-iSN04(-)  
677 (Tukey-Kramer test).  $n = 6$ . **(B)** qPCR results of gene expression in the H35M  
678 myoblasts differentiated as in panel (A). Mean value of control-iSN04(-)  
679 group was set to 1.0 for each gene. \*  $p < 0.05$ , \*\*  $p < 0.01$  vs. control-iSN04(-);  
680 †  $p < 0.05$  vs. palmitic acid-iSN04(-) (Tukey-Kramer test).  $n = 3$ .

Figure 1

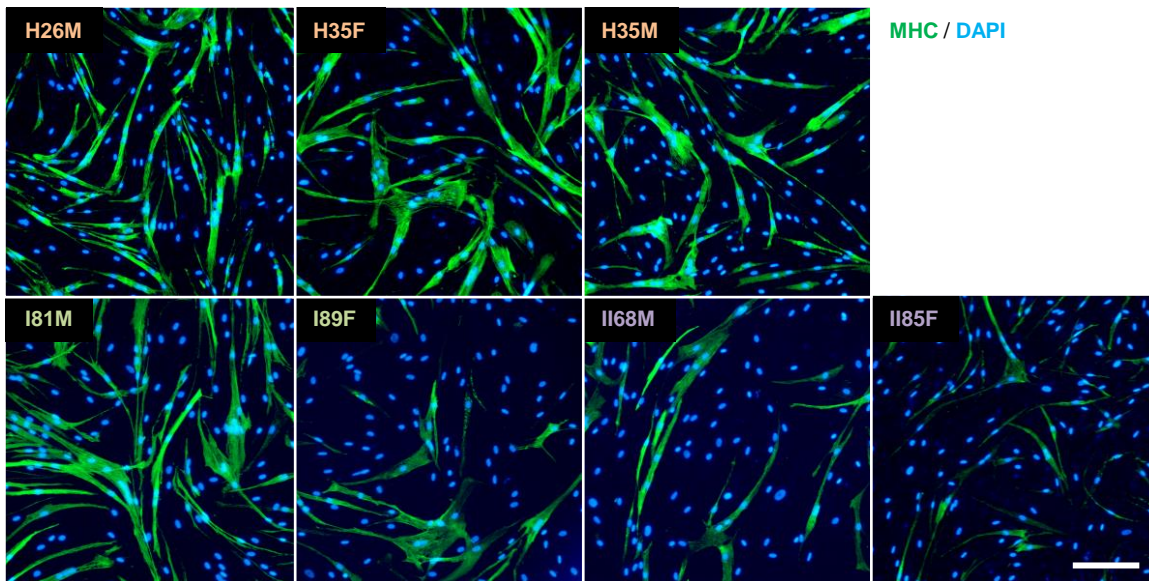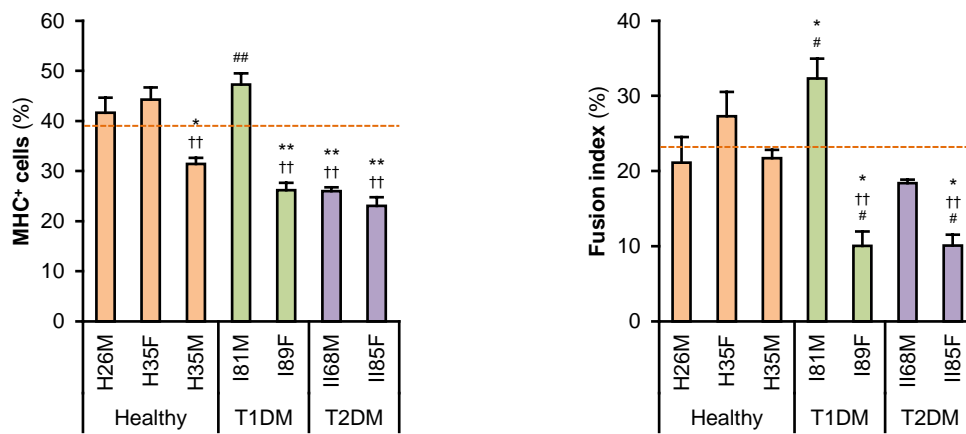



Figure 2

A

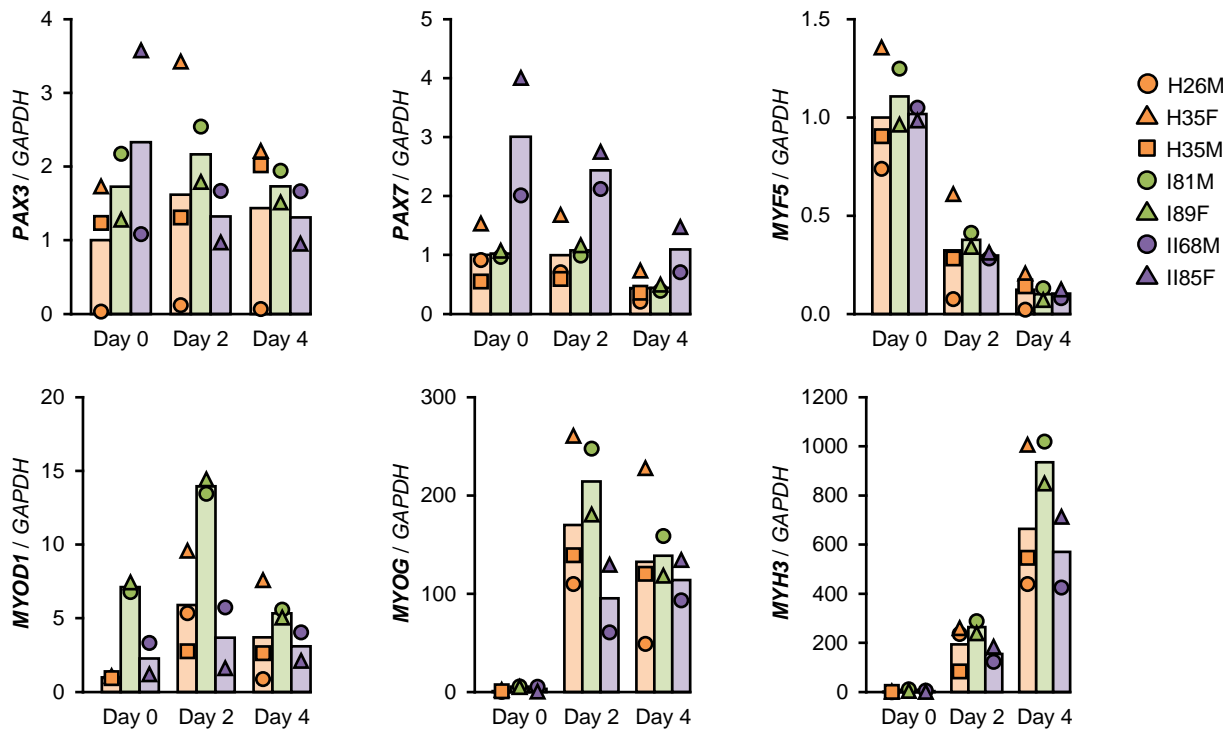

B

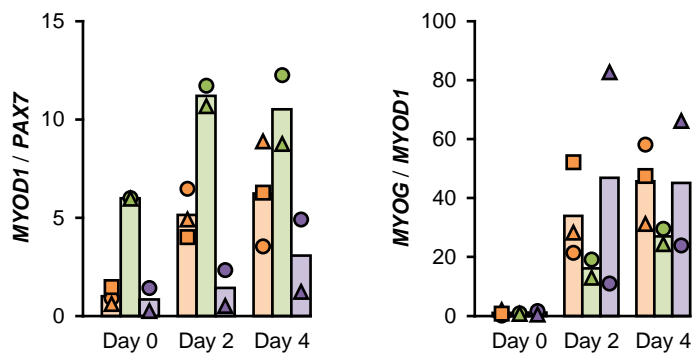

C

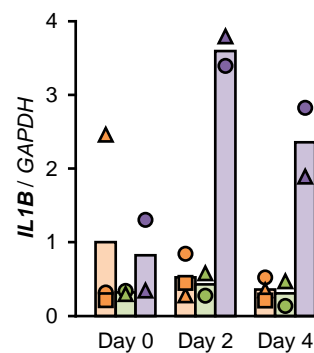

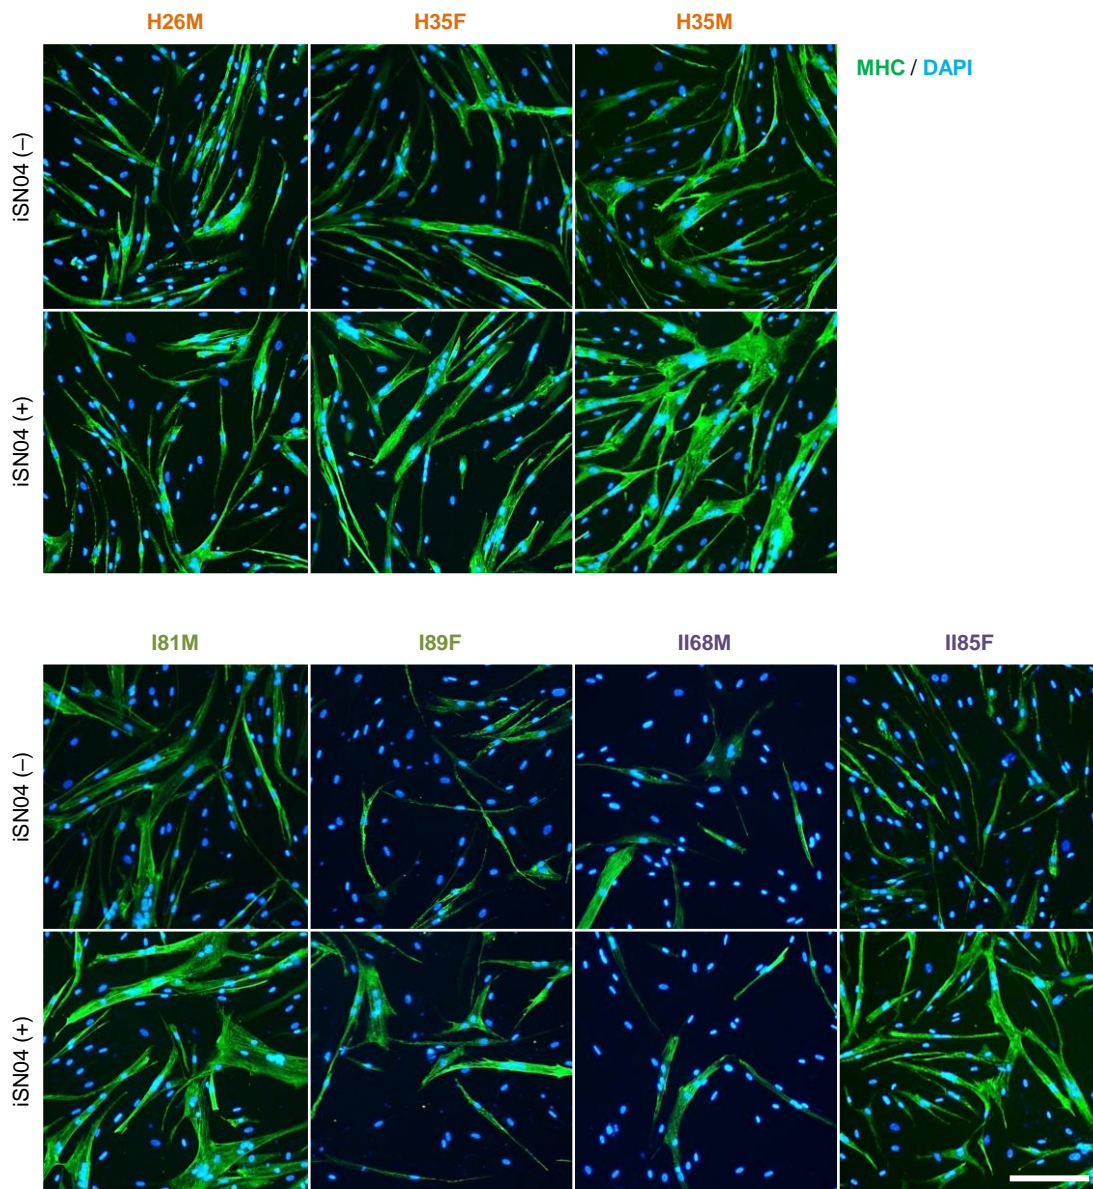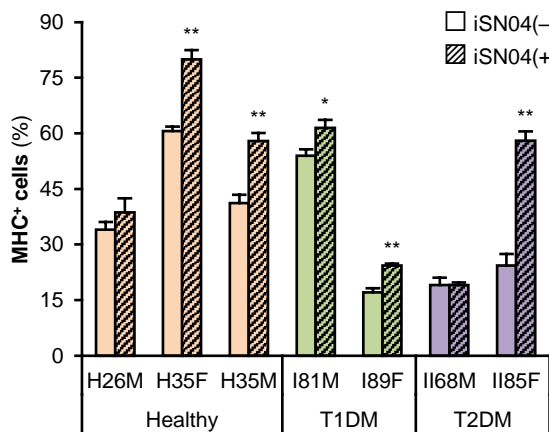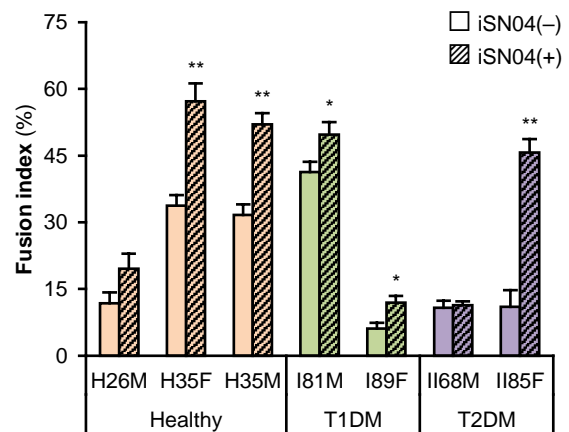

**A**

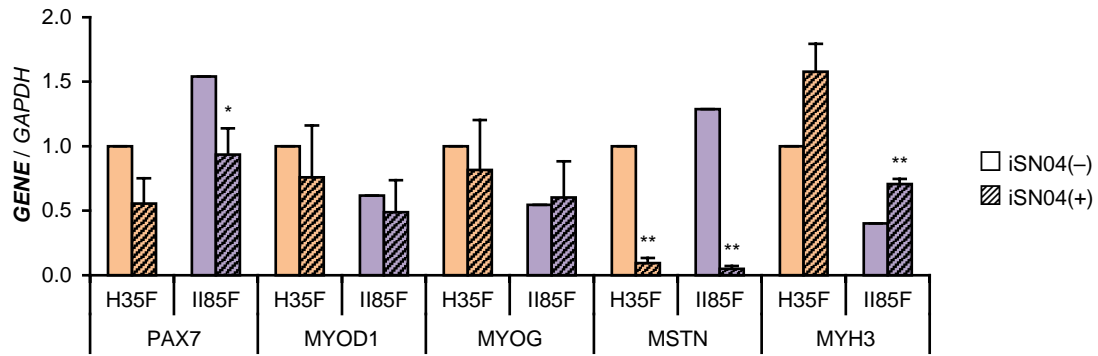

**B**

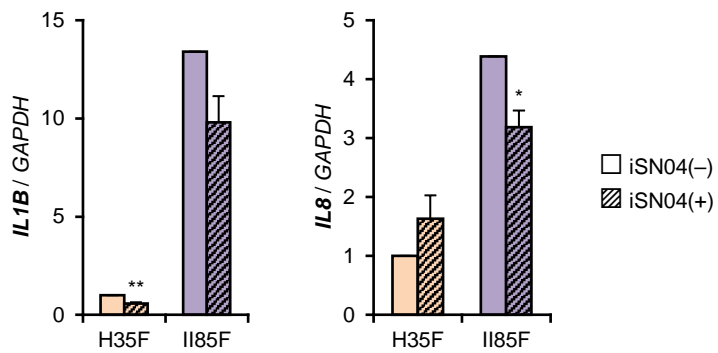

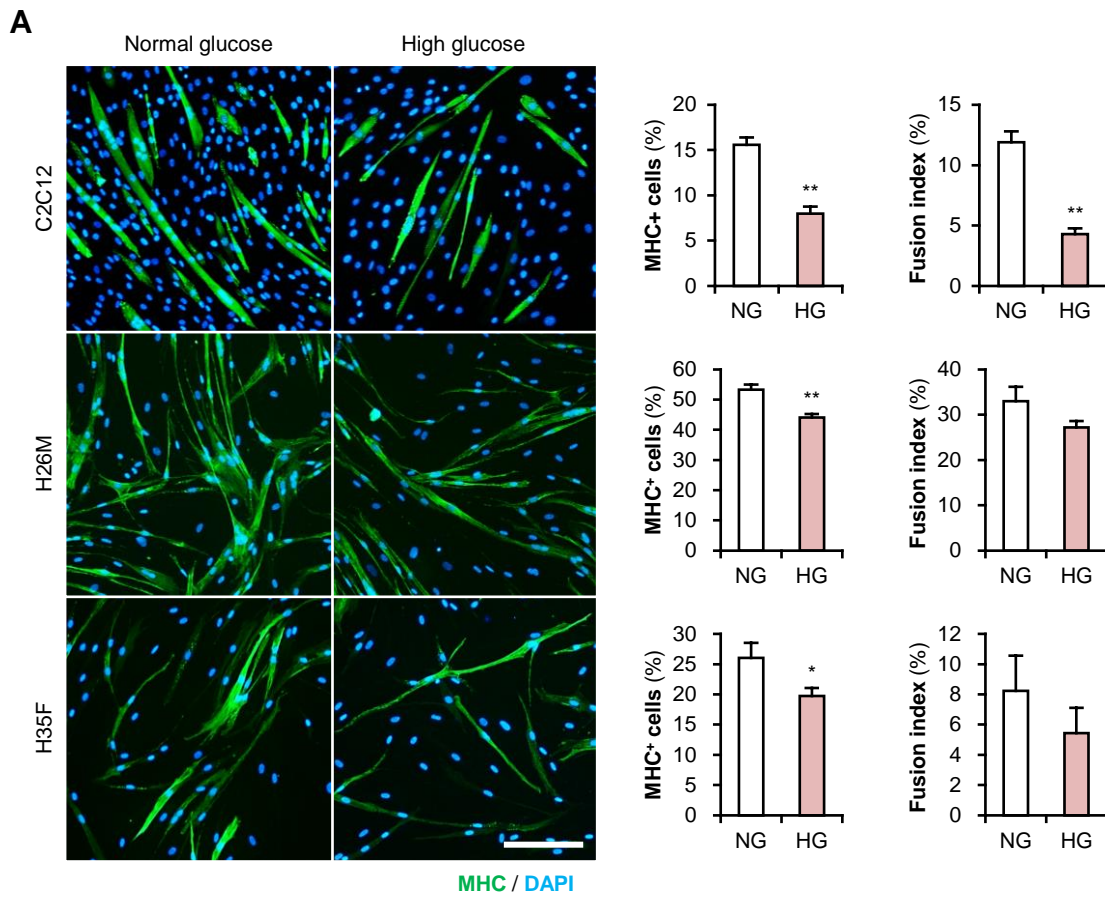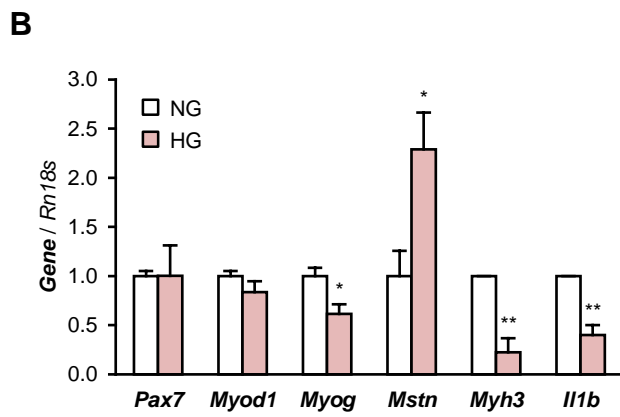

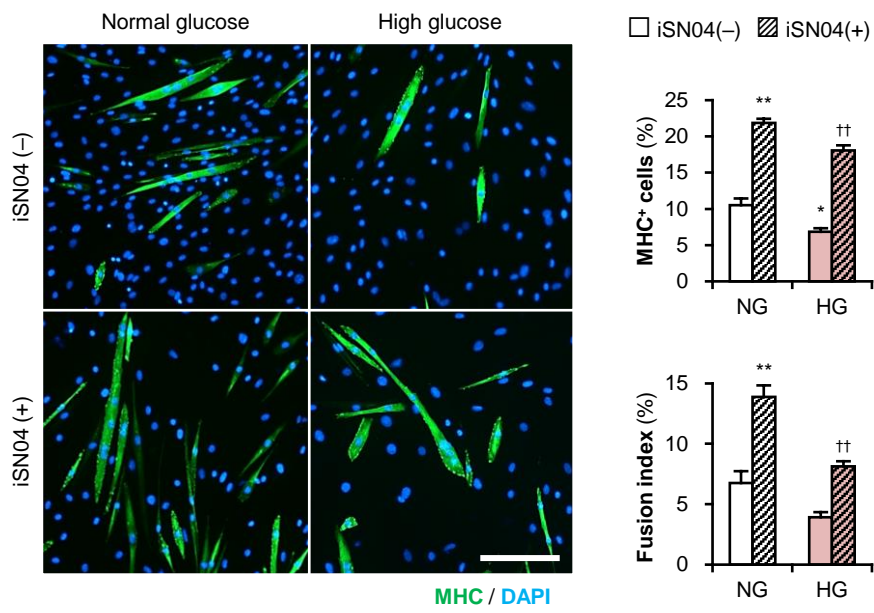

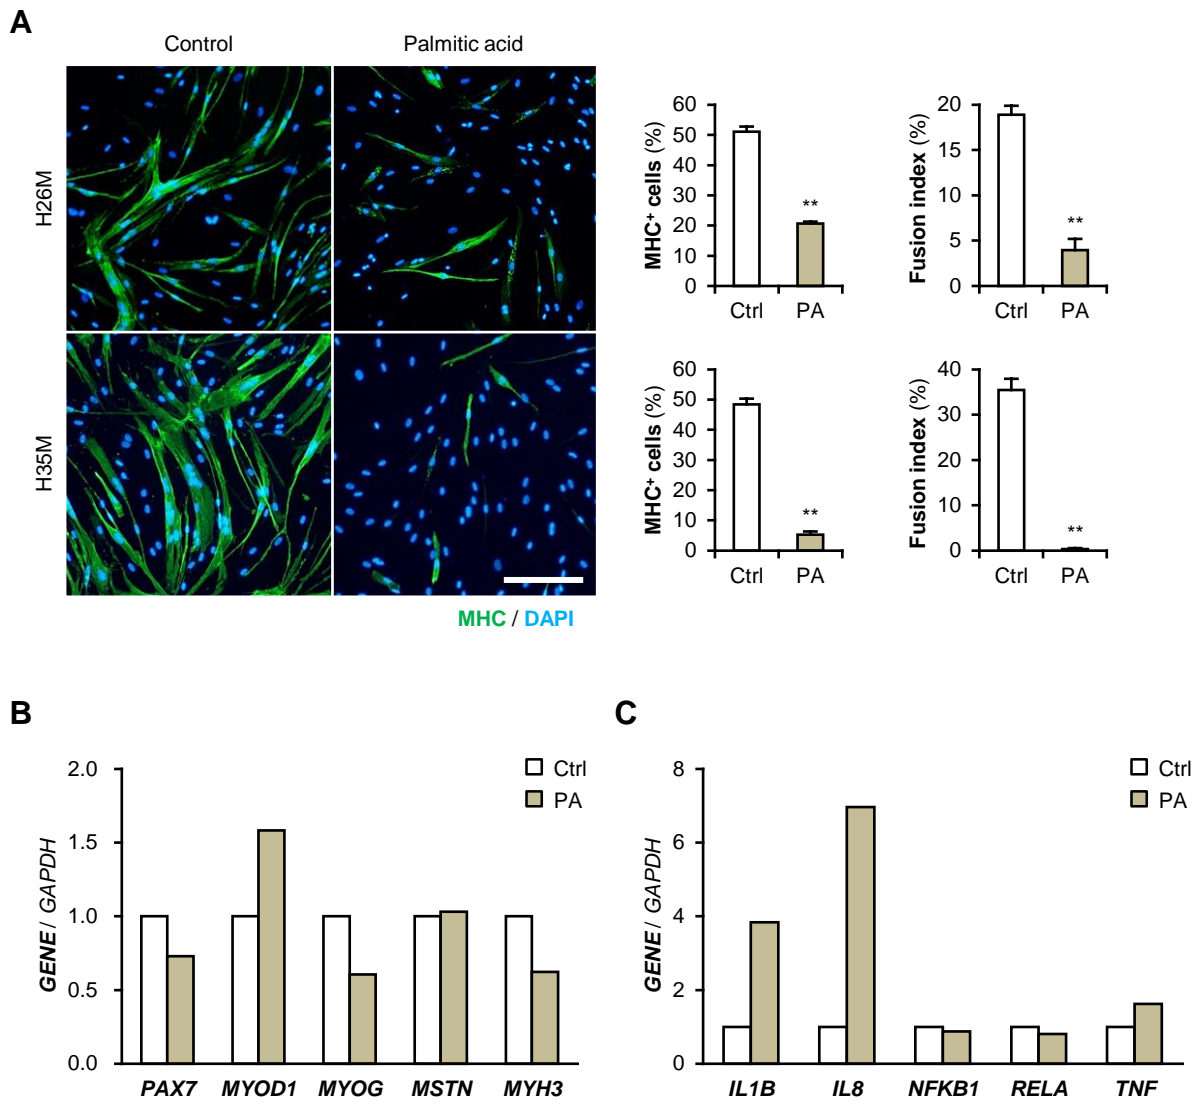

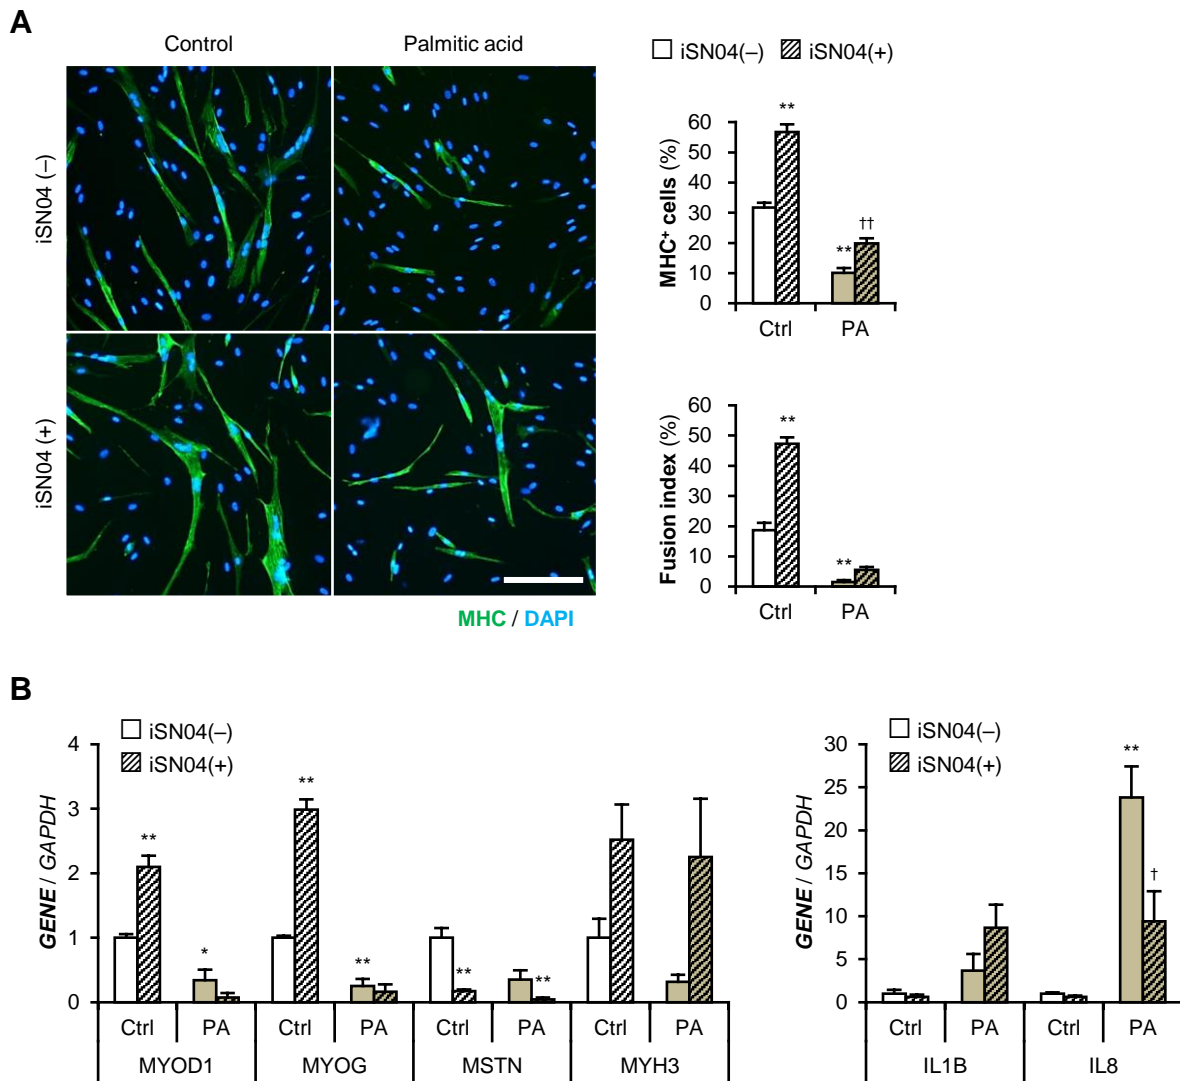

Source: https://www.biorxiv.org/content/10.1101/2021.03.10.434717v1.full.pdf
