# Supplementary material for: Myogenetic oligodeoxynucleotide (myoDN) recovers the differentiation of skeletal muscle myoblasts deteriorated by diabetes mellitus
Source: bioRxiv or medRxiv preprint supplement (doi:10.1101/2021.03.10.434717), 2021-03-10

## Supplementary Material

**Supplementary Table S1.** qPCR primer sequences for human genes.

| Gene                           | Sequence (5'-3')                                      | Reference               |
|--------------------------------|-------------------------------------------------------|-------------------------|
| <i>ACVR2B</i>                  | GGCTGCTGGCTAGATGACTT<br>AAGCGTTCGTTGCAGAAGTT          | Senanayake et al., 2012 |
| <i>CPT2</i>                    | AGCCTCTCTTGAATGATGGCC<br>GATAGGTACATATCAAACCAGGG      | Boufroua et al., 2018   |
| <i>FASN</i>                    | CTTCCGAGATTCCATCCTACGC<br>TGGCAGTCAGGCTCACAAACG       | Sun et al., 2018        |
| <i>FBXO32</i>                  | CCCAAGGAAAGAGCAGTATGGAGA<br>GGGTGAAAGTGAAACGGAGCA     | D'Hulst et al., 2013    |
| <i>FST</i>                     | TGCTCTGCCAGTTCATGG<br>CTTGACGGAGCCAGCAGT              | Cheng et al., 2014      |
| <i>GAPDH</i>                   | TGTCAAGCTCATTTCCTGGTA<br>GTGAGGGTCTCTCTCTTCCTCTTGT    | Shinji et al., 2020     |
| <i>IFNG</i>                    | AGGGAAGCGAAAAAGGAGTCA<br>GGACAACCATTACTGGGATGCT       | Chege et al., 2010      |
| <i>IL1B</i>                    | TCCCCAGCCCTTTTGTGTA<br>TTAGAACCAAATGTGGCCGTG          | Sjolinder et al., 2012  |
| <i>IL6</i>                     | CGGGAACGAAAGAGAAGCTCTA<br>GAGCAGCCCCAGGGAGAA          | Grosse et al., 2012     |
| <i>IL8</i><br>( <i>CXCL8</i> ) | TGGCAGCCTTCCTGATTTCT<br>GGGTGAAAGGTTTGGAGTATG         | Grosse et al., 2012     |
| <i>IRS1</i>                    | TATGCCAGCATCAGTTTCCA<br>TTGCTGAGGTCATTTAGGTCTT        | Zhao et al., 2017       |
| <i>IRS2</i>                    | TTCTTGTCCCACCACTTGAA<br>CTGACATGTGACATCCTGGTG         | Zhao et al., 2017       |
| <i>MSTN</i>                    | CTACAACGGAAACAATCATTACCA<br>GTTTCAGAGATCGGATTCCAGTAT  | Bathgate et al., 2018   |
| <i>MYF5</i>                    | AGAACTACTATAGCCTGCCGG<br>ATCTGTGGCATATACATTTGATACATCA | Zibat et al., 2010      |

|               |                                                       |                                     |
|---------------|-------------------------------------------------------|-------------------------------------|
| <i>MYH3</i>   | GGACAGGAAGAATGTGCTGAGATT<br>GCCTCTTGTAGGACTTGACTTTTAC | Shinji et al., 2021                 |
| <i>MYOD1</i>  | TGCTCCGACGGCATGATGGAC<br>TCGACACCGCCGCACTCT           | Shinji et al., 2021                 |
| <i>MYOG</i>   | AACCCAGGGGATCATCTGCTCAC<br>GTTGGGCATGGTTTCATCTGGGAAG  | Shinji et al., 2021                 |
| <i>NCL</i>    | ATTGGTAGCAACTCCTGGTAAG<br>CACTGTCATCATCCTCCTCTTC      | Shinji et al., 2021                 |
| <i>NFKB1</i>  | CACAAGGCAGCAAATAGACG<br>GAGTTAGCAGTGAGGCACCA          | Zhao et al., 2018                   |
| <i>PAX3</i>   | AGGAAGGAGGCAGAGGAAAG<br>CAGCTGTTCTGCTGTGAAGG          | Sato et al., 2019                   |
| <i>PAX7</i>   | GACCCCTGCCTAACACATC<br>GTCTCCTGGTAGCGGCAAAG           | Shinji et al., 2021                 |
| <i>RELA</i>   | CGTTTCTTACACACTGGATTC<br>ACTGCCGGGATGGCTTCT           | Grosse et al., 2012                 |
| <i>SLC2A4</i> | CATCCTGATGACTGTGGCTC<br>TCTCATCTGGCCCTAAATACT         | Armoni et al., 2005                 |
| <i>SREBF1</i> | TCCCAGCCCCTCAGATACCAC<br>CCCATTGAGCAGCCAGACCAC        | Yang et al., 2019                   |
| <i>SREBF2</i> | CCCTCACCACCCTATCCAGA<br>CTCTTGCCCCATCATTACAGG         | Yang et al., 2019                   |
| <i>TNF</i>    | CCTGCCCAATCCCTTTATT<br>CCCTAAGCCCCAATTCTCT            | Sjolinder et al., 2012              |
| <i>TP53</i>   | AGGCCTTGGAACCTCAAGGAT<br>CCCTTTTTGGACTTCAGGTG         | Henriksen et al., 2017              |
| <i>TRIM63</i> | AAACAGGAGTGCTCCAGTCGG<br>CGCCACCAGCATGGAGATACA        | D'Hulst et al., 2013                |
| <i>TXNIP</i>  | GGCTAAAGTGCTTTGGATGC<br>AGGTCTCATGATCACCATCTCA        | Houshmand-Oeregaard<br>et al., 2017 |

6 **Supplementary Table S2.** qPCR primer sequences for murine genes.

|              |                                                         |                       |
|--------------|---------------------------------------------------------|-----------------------|
| <i>Ilf1b</i> | TTGACGGACCCCAAAGATG<br>CAGGACAGCCCAGGTCAAA              | Qu et al., 2009       |
| <i>Mstn</i>  | ATGGCCATGATCTTGCTGTA<br>CCTTGACTTCTAAAAGGGATTCA         | Han et al., 2010      |
| <i>Myh3</i>  | CACCTGGAGAGGATGAAGAAGAA<br>AGGACTTGACTTTCACCTGGAGTTTATC | This study            |
| <i>Myod1</i> | GATGGCATGATGGATTACAGCGGC<br>GTGGAGATGCGCTCCACTATGCTG    | This study            |
| <i>Myog</i>  | CCCTATTTCTACCAGGAGCCCCAC<br>GCGCAGGATCTCCACTTTAGGCAG    | Watanabe et al., 2011 |
| <i>Pax7</i>  | CGCGTCCAGGTCTGGTTCAGTAAC<br>GTACTGTGCTGCCTCCATCTTGGG    | This study            |
| <i>Rn18s</i> | CGCACGGCCGGTACAGTGAAACTG<br>CACCCGTGGTCACCATGGTAGGCA    | Nihashi et al., 2019  |

8 **Supplementary Figure Legends**

9

10 **Supplementary Figure S1.** The hMBs used in this study. Representative  
11 images of the hMBs maintained in hMB-GM-NG. Scale bars, 500  $\mu\text{m}$  ( $\times 40$ )  
12 and 50  $\mu\text{m}$  ( $\times 200$ ).

13

14 **Supplementary Figure S2.** Attenuated myogenic differentiation of DM  
15 myoblasts. Ratio of MHC<sup>+</sup> cells and multinuclear myotubes of the hMBs  
16 differentiated in DIM-NG for 0, 2, and 4 days. Bars indicate mean values of  
17 each group.

18

19 **Supplementary Figure S3.** qPCR results of muscle atrophic gene expression  
20 in the hMBs differentiated in DIM-NG for 0, 2, and 4 days. Bars indicate  
21 mean values of each group. The mean value of healthy myoblasts at day 0  
22 was set to 1.0 for each gene.

23

24 **Supplementary Figure S4.** qPCR results of metabolic gene expression in the  
25 hMBs differentiated in DIM-NG for 0, 2, and 4 days. Bars indicate mean  
26 values of each group. The mean value of healthy myoblasts at day 0 was set  
27 to 1.0 for each gene.

28

29 **Supplementary Figure S5.** qPCR results of inflammatory gene expression in  
30 the hMBs differentiated in DIM-NG for 0, 2, and 4 days. Bars indicate mean

31 values of each group. The mean value of healthy myoblasts at day 0 was set  
32 to 1.0 for each gene.

33

34 **Supplementary Figure S6.** iSN04 promotes the differentiation of H26M  
35 myoblasts in GM. Representative immunofluorescent images of the H26M  
36 differentiated in hMB-GM-NG with 10  $\mu$ M iSN04 for 2 days. Scale bar, 200  
37  $\mu$ m. Ratio of MHC<sup>+</sup> cells and multinuclear myotubes were quantified. \*\*  $p <$   
38 0.01 vs control (Student's  $t$  test).  $n = 6$ .

39

40 **Supplementary Figure S7.** Expression and localization of nucleolin in the  
41 hMBs used in this study. **(A)** qPCR results of *NCL* expression in the hMBs  
42 differentiated in DIM-NG for 0, 2, and 4 days. Bars indicate mean values of  
43 each group. The mean value of healthy myoblasts at day 0 was set to 1.0 for  
44 each gene. **(B)** Representative immunofluorescent images of the hMBs  
45 differentiated in hMB-DIM-NG. Scale bar, 50  $\mu$ m.

46

47 **Supplementary References**

48

49 Armoni, M., Harel, C., Bar-Yoseph, F., Milo, S., Karnieli, E. (2005). Free fatty  
50 acids repress the GLUT4 gene expression in cardiac muscle via novel  
51 response elements. *J. Biol. Chem.* 280, 34786-34795. doi:  
52 10.1074/jbc.M502740200

53 Bathgate, K. E., Bagley, J. R., Jo, E., Talmadge, R. J., Tobias, I. S., Brown, L.  
54 E., et al. (2018). Muscle health and performance in monozygotic twins  
55 with 30 years of discordant exercise habits. *Eur. J. Appl. Physiol.* 118,  
56 2097-2110. doi: 10.1007/s00421-018-3943-7

57 Boufroua, F. Z., Le Bachelier, C., Tomkiewicz-Raulet, C., Schlemmer, D.,  
58 Benoist, J. F., Grondin, P., et al. (2018). A new AMPK activator, GSK773,  
59 corrects fatty acid oxidation and differentiation defect in CPT2-deficient  
60 myotubes. *Hum. Mol. Genet.* 27, 3417-3433. doi: 10.1093/hmg/ddy254

61 Chege, D., Chai, Y., Huibner, S., McKinnon, L., Wachihi, C., Kimani, M., et al.  
62 (2010). *PLoS One* 5, e13077. doi: 10.1371/journal.pone.0013077

63 Cheng, J. C., Chang, H. M., Qiu, X., Fang, L., Leung, P. C. (2014).  
64 FOXL2-induced follistatin attenuates activin A-stimulated cell  
65 proliferation in human granulosa cell tumors. *Biochem. Biophys. Res.*  
66 *Commun.* 443, 537-542. doi: 10.1016/j.bbrc.2013.12.010

67 D'Hulst, G., Jamart, C., Van Thienen, R., Hespel, P., Francaux, M., Deldicque,  
68 L. (2013). Effect of acute environmental hypoxia on protein metabolism in  
69 human skeletal muscle. *Acta Physiol.* 208, 251-264. doi:  
70 10.1111/apha.12086

- 71 Grosse, J., Wehland, M., Pietsch, J., Schulz, H., Saar, K., Hubner, N., et al.  
72 (2012). Gravity-sensitive signaling drives 3-dimensional formation of  
73 multicellular thyroid cancer spheroids. *FASEB J.* 26, 5124-5140. doi:  
74 10.1096/fj.12-215749
- 75 Han, D. S., Huang, H. P., Wang, T. G., Hung, M. Y., Ke, J. Y., Chang, K. T., et  
76 al. (2010). Transcription activation of myostatin by trichostatin A in  
77 differentiated C2C12 myocytes via ASK1-MKK3/4/6-JNK and p38  
78 mitogen-activated protein kinase pathways. *J. Cell. Biochem.* 111, 564-573.  
79 doi: 10.1002/jcb.22740
- 80 Henriksen, T. I., Davidsen, P. K., Pedersen, M., Schultz, H. S., Hansen, N. S.,  
81 Larsen, T. J., et al. (2017). Dysregulation of a novel miR-23b/27b-p53 axis  
82 impairs muscle stem cell differentiation of humans with type 2 diabetes.  
83 *Mol. Metab.* 6, 770-779. doi: 10.1016/j.molmet.2017.04.006
- 84 Houshmand-Oeregaard, A., Hjort, L., Kelstrup, L., Hansen, N. S., Broholm,  
85 C., Gillberg, L., et al. (2017). DNA methylation and gene expression of  
86 TXNIP in adult offspring of women with diabetes in pregnancy. *PLoS One*  
87 12, e0187038. doi: 10.1371/journal.pone.0187038
- 88 Nihashi, Y., Umezawa, K., Shinji, S., Hamaguchi, Y., Kobayashi, H., Kono, T.,  
89 et al. (2019). Distinct cell proliferation, myogenic differentiation, and gene  
90 expression in skeletal muscle myoblasts of layer and broiler chickens. *Sci.*  
91 *Rep.* 9, 16527. doi: 10.1038/s41598-019-52946-4
- 92 Qu, P., Du, H., Wilkes, D. S., Yan, C. (2009). Critical roles of lysosomal acid  
93 lipase in T cell development and function. *Am. J. Pathol.* 174, 944-956. doi:  
94 10.2353/ajpath.2009.080562

- 95 Sato, T., Higashioka, K., Sakurai, H., Yamamoto, T., Goshima, N., Ueno, M.,  
96 et al. (2019). Core transcription factors promote induction of  
97 PAX3-positive skeletal muscle stem cells. *Stem Cell Reports* 13, 352-365.  
98 doi: 10.1016/j.stemcr.2019.06.006
- 99 Senanayake, U., Das, S., Vesely, P., Alzoughbi, W., Frohlich, L. F., Chowdhury,  
100 P., et al. (2012). miR-192, miR-194, miR-215, miR-200c and miR-141 are  
101 downregulated and their common target ACVR2B is strongly expressed in  
102 renal childhood neoplasms. *Carcinogenesis* 33, 1014-1021. doi:  
103 10.1093/carcin/bgs126
- 104 Shinji, S., Nakamura, S., Nihashi, Y., Umezawa, K., and Takaya, T. (2020).  
105 Berberine and palmatine inhibit the growth of human rhabdomyosarcoma  
106 cells. *Biosci. Biotechnol. Biochem.* 84, 63-75. doi:  
107 10.1080/09168451.2019.1659714
- 108 Shinji, S., Umezawa, K., Nihashi, Y., Nakamura, S., Shimosato, T., and  
109 Takaya, T. (2021). Identification of the myogenetic oligodeoxynucleotides  
110 (myoDNs) that promote differentiation of skeletal muscle myoblasts by  
111 targeting nucleolin. *Front. Cell Dev. Biol.* 8, 616706. doi:  
112 10.3389/fcell.2020.616706
- 113 Sjolinder, M., Altenbacher, G., Wang, X., Gao, Y., Hansson, C., and Sjolinder,  
114 H. (2012). The meningococcal adhesin NhhA provokes proinflammatory  
115 responses in macrophages via toll-like receptor 4-dependent and  
116 -independent pathways. *Infect. Immun.* 80, 4027-4033. doi:  
117 10.1128/IAI.00456-12



- 118 Sun, L., Yao, Y., Pan, G., Zhan, S., Shi, W., Lu, T., et al. (2018). Small  
119 interfering RNA-mediated knockdown of fatty acid synthase attenuates  
120 the proliferation and metastasis of human gastric cancer cells via the  
121 mTOR/Gli1 signaling pathway. *Oncol. Lett.* 16, 594-602. doi:  
122 10.3892/ol.2018.8648
- 123 Watanabe, S., Hirai, H., Asakura, Y., Tastad, C., Verma, M., Keller, C., et al.  
124 (2011). MyoD gene suppression by Oct4 is required for reprogramming in  
125 myoblasts to produce induced pluripotent stem cells. *Stem Cells* 29,  
126 505-513. doi: 10.1002/stem.598
- 127 Yang, H., Li, J., Yang, C., Liu, H., and Cao, Y. (2019). Multi-walled carbon  
128 nanotubes promoted lipid accumulation in human aortic smooth muscle  
129 cells. *Toxicol. Appl. Pharmacol.* 374, 11-19. doi: 10.1016/j.taap.2019.04.022
- 130 Zhao, H., Liu, F., Jia, R., Chang, H., Li, H., Miao, M., et al. (2017). MiR-570  
131 inhibits cell proliferation and glucose metabolism by targeting IRS1 and  
132 IRS2 in human chronic myelogenous leukemia. *Iran. J. Basic Med. Sci.* 20,  
133 481-488. doi: 10.22038/IJBMS.2017.8671
- 134 Zhao, M., Joy, J., Zhou, W., De, S., Wood, W. H., 3rd, Becker, K. G., et al.  
135 (2018). Transcriptional outcomes and kinetic patterning of gene  
136 expression in response to NF- $\kappa$ B activation. *PLoS Biol.* 16, e2006347. doi:  
137 10.1371/journal.pbio.2006347
- 138 Zibat, A., Missiaglia, E., Rosenberger, A., Pritchard-Jones, K., Shipley, J.,  
139 Hahn, H., et al. (2010). Activation of the hedgehog pathway confers a poor  
140 prognosis in embryonal and fusion gene-negative alveolar  
141 rhabdomyosarcoma. *Oncogene* 29, 6323-6330. doi: 10.1038/onc.2010.368

Figure S1

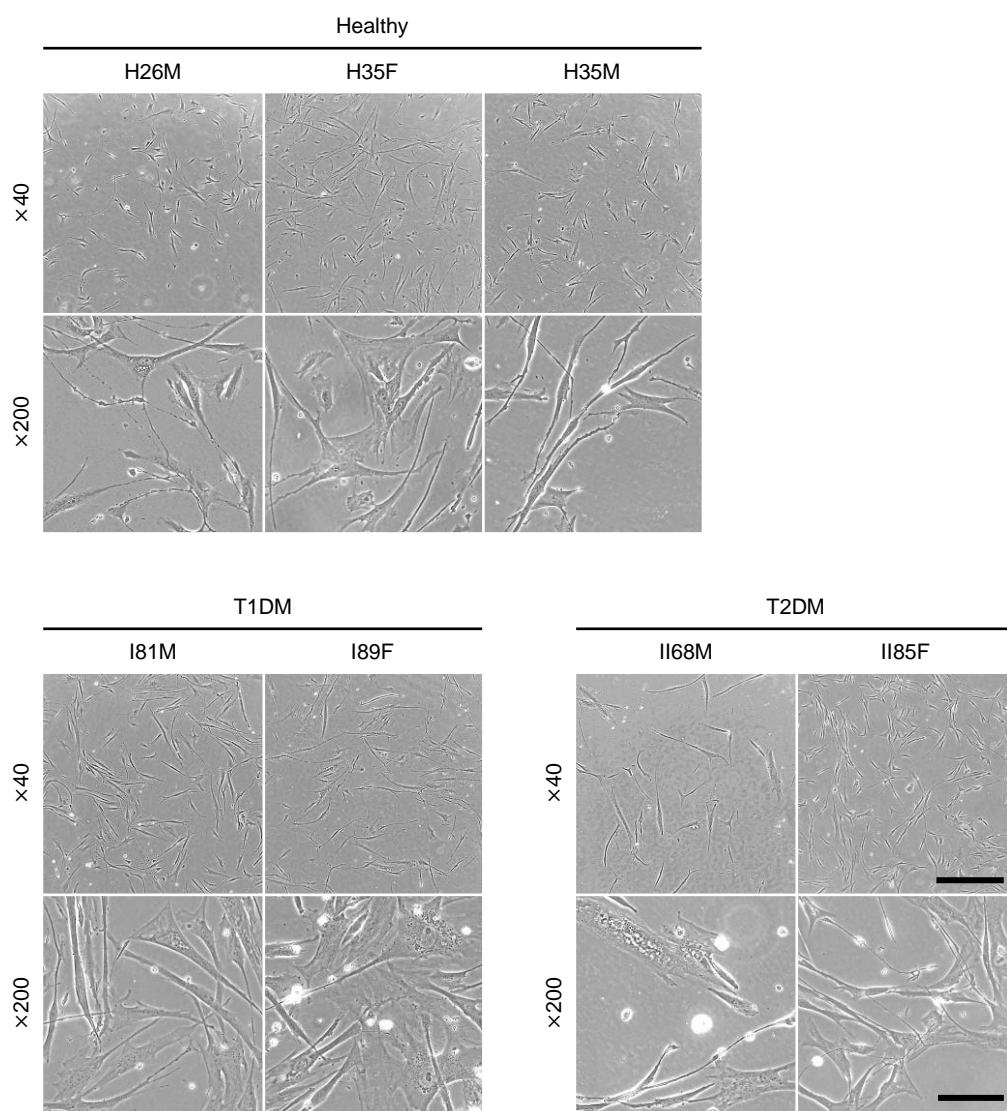

Figure S2

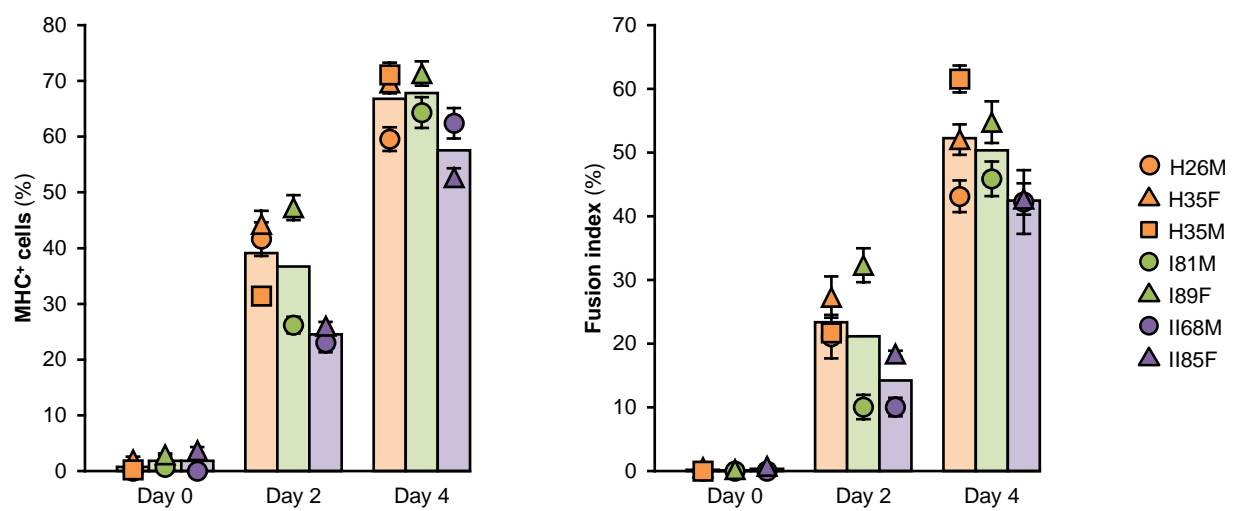

Figure S3

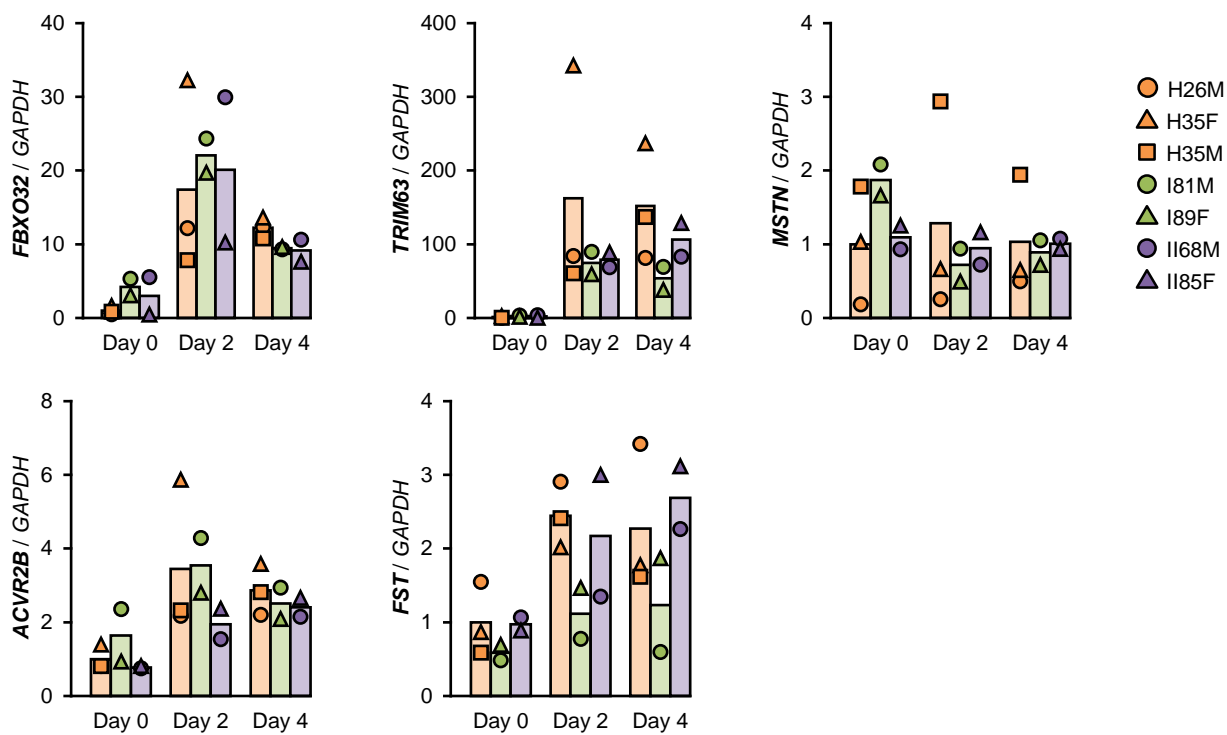

Figure S4

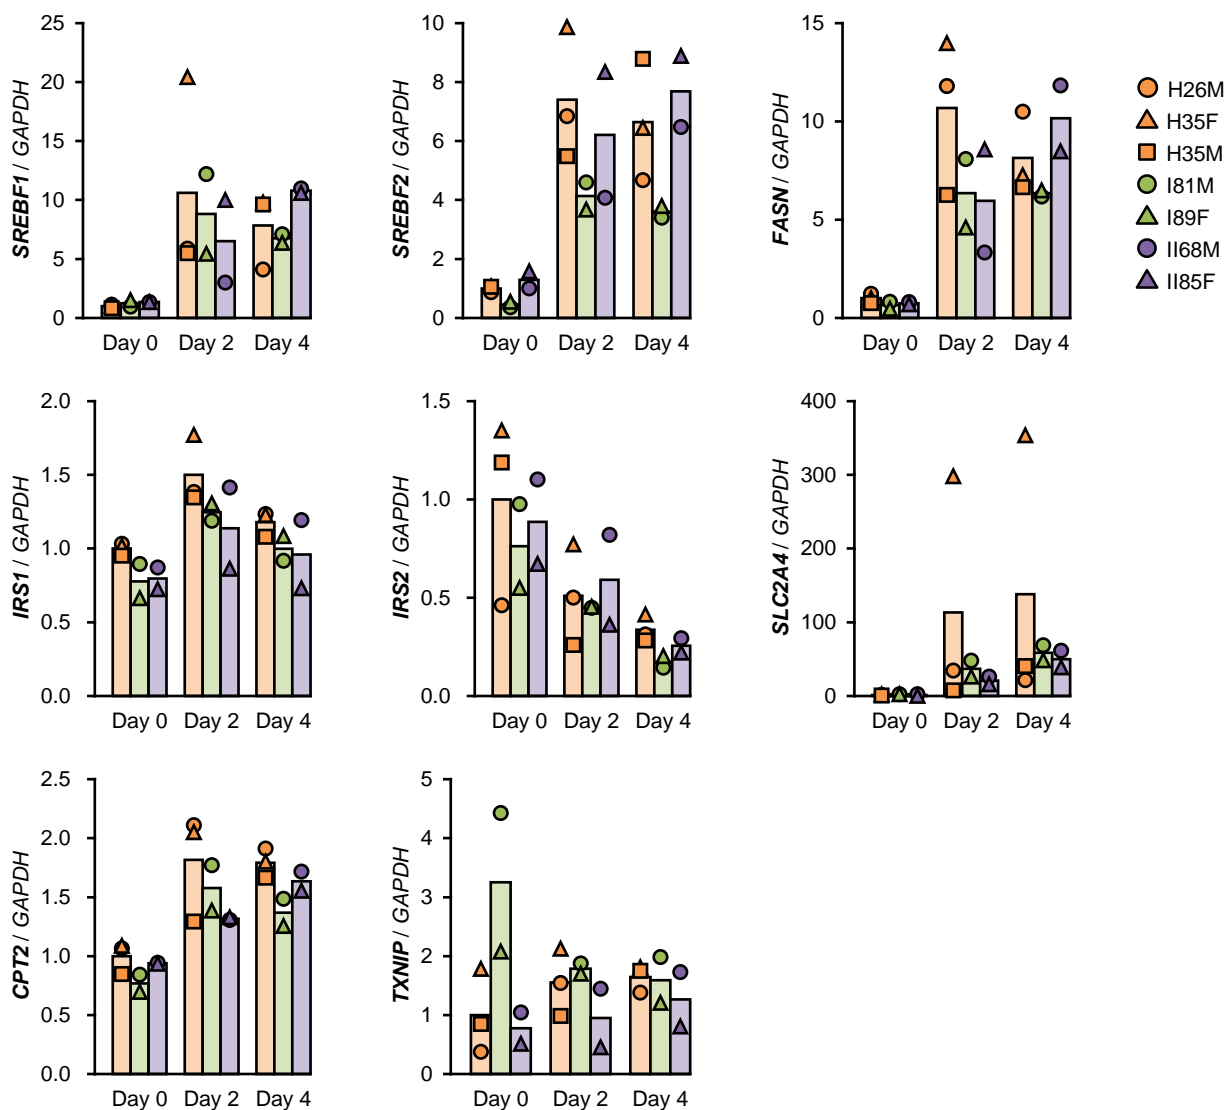

Figure S5

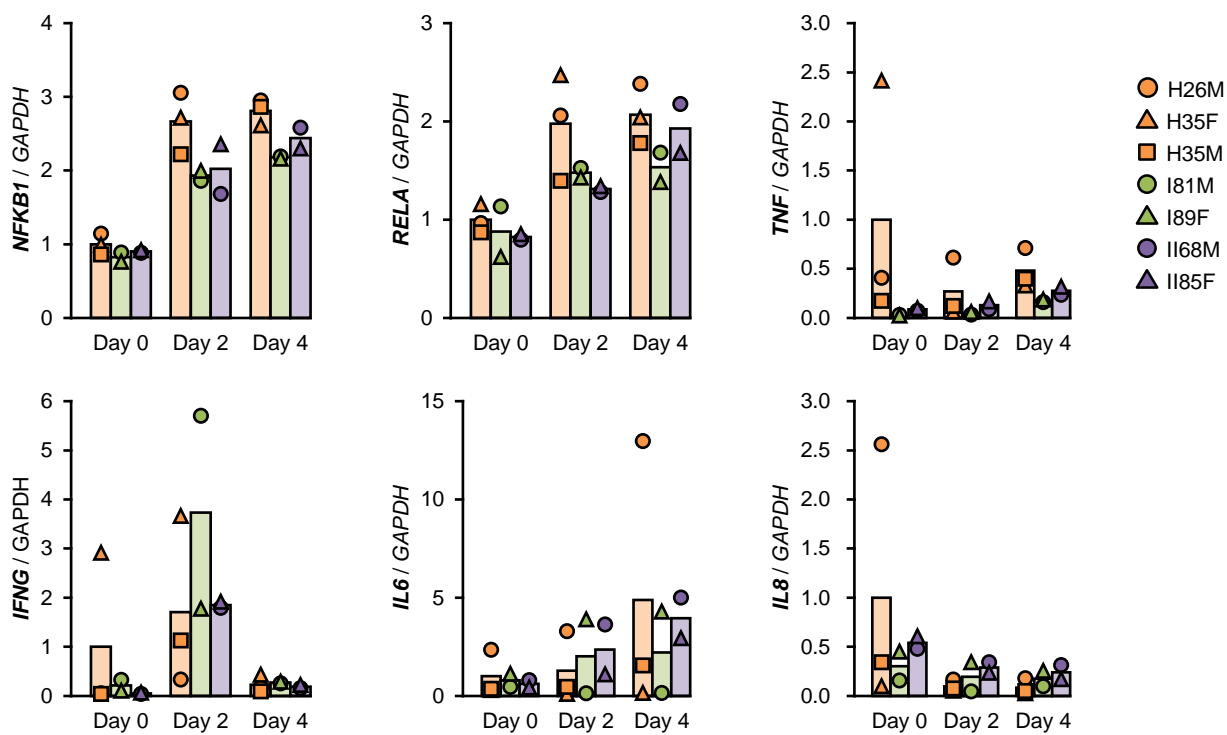

Figure S6

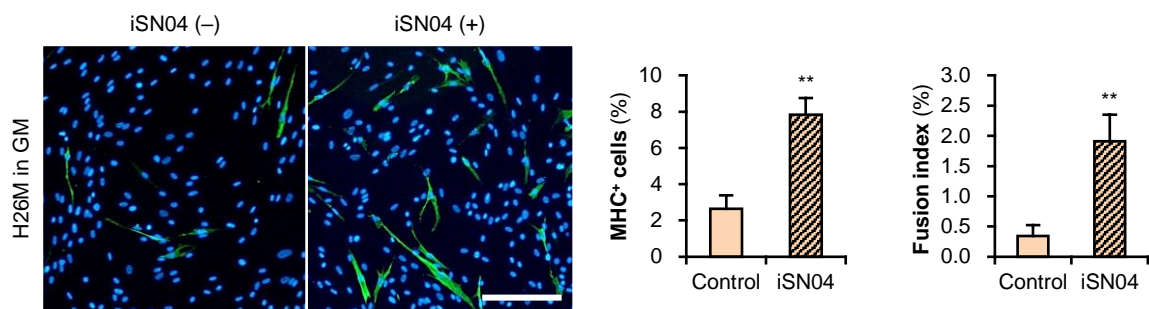

**A**

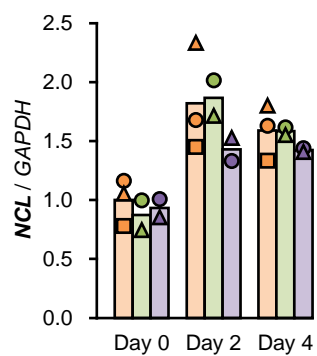

**B**

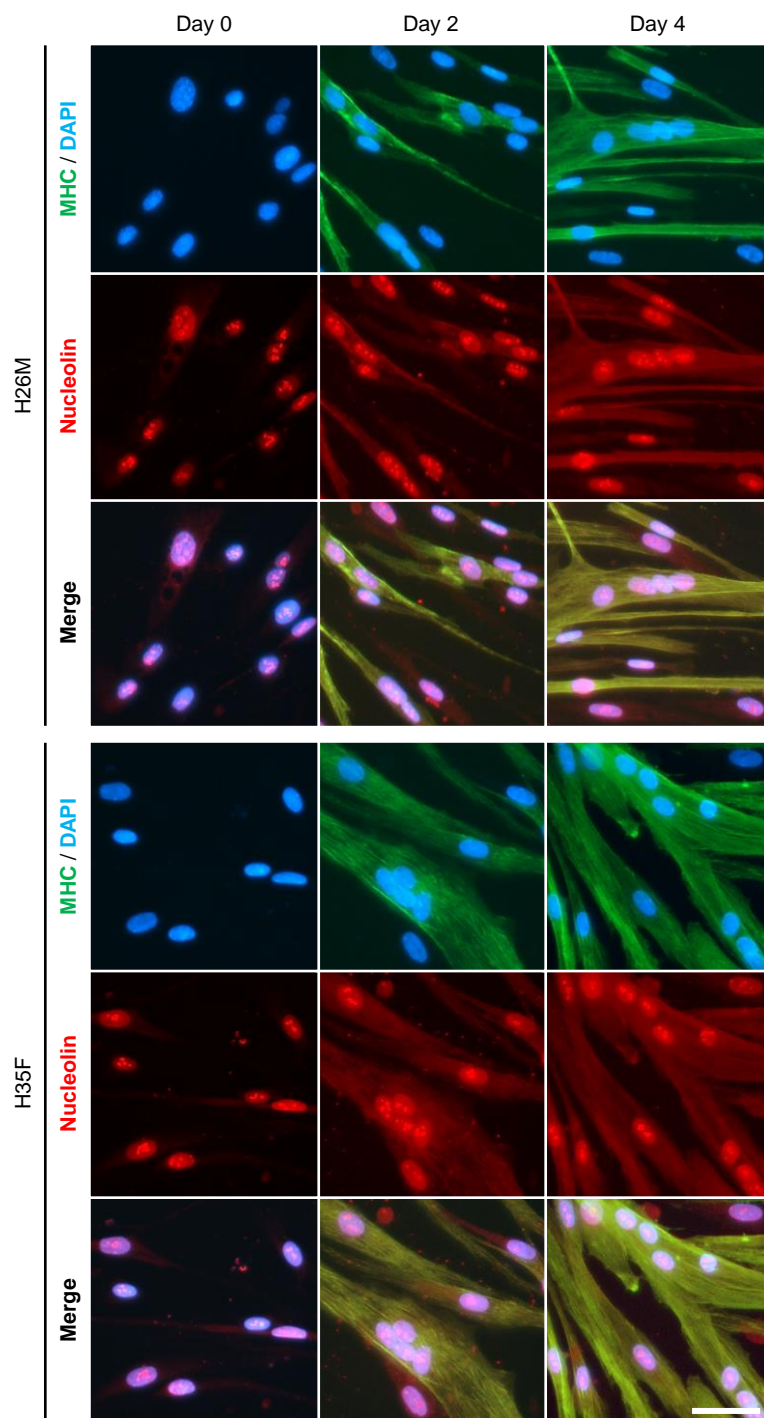

Supplement: Supplementary file [file media-1.pdf]
